# Supplementary material for: Characterizing the Molecular Spatial and Temporal Field of Injury in Early-Stage Smoker Non–Small Cell Lung Cancer Patients after Definitive Surgery by Expression Profiling
Source: Oxford University Press journal article supplement (doi:10.1158/1940-6207.capr-12-0290), 2012-10-19
Supplement: 19406207capr120290-sup-tab1.xlsx [file 19406207capr120290-sup-tab1.xlsx]

## Sheet: Sheet1
Supplementary Table 1
UNIQID	Symbol	Accession	p-value	Gene cluster
7961580	LMO3	NM_018640	0	5
8036284	COX7A1	NM_001864	8.88e-15	7
8105220	ISL1	NM_002202	5.56e-14	7
8111864	C6	NM_001115131	2.05e-13	5
7991546	LASS3	NM_178842	3.86e-13	4
8036787	FCGBP	NM_003890	1.12e-12	7
8103544	SPOCK3	NM_001040159	2.55e-12	3
8055952	NR4A2	NM_006186	3.18e-12	7
7909610	ATF3	NM_001040619	5.14e-11	7
7946436	ASCL3	NM_020646	8.98e-11	3
8021623	SERPINB7	NM_003784	9.39e-11	3
7955589	NR4A1	NM_002135	1.26e-10	7
8059345	SCG2	NM_003469	1.3e-10	3
8137627	DNAJB6	NM_058246	2.55e-10	7
8044143	C2orf40	NM_032411	2.7e-10	5
8127380	LGSN	NM_016571	3.43e-10	3
7930413	DUSP5	NM_004419	7.94e-10	7
8066347	PTPRT	NM_133170	1.01e-09	3
8061780	BPIL1	NM_025227	1.03e-09	7
8144621	C8orf12	NR_026814	1.29e-09	3
8115831	DUSP1	NM_004417	1.41e-09	7
8153334	PSCA	NM_005672	1.45e-09	7
8068383	CLIC6	NM_053277	1.55e-09	5
8149811	NKX3-1	NM_006167	1.8e-09	4
7910923	FMN2	NM_020066	2.01e-09	5
8089568	CD200R1	NM_138806	2.24e-09	7
8095688	CXCL6	NM_002993	3.45e-09	3
7927681	BICC1	NM_001080512	3.45e-09	5
7984079	TPM1	NM_000366	4.49e-09	3
7965573	NTN4	NM_021229	5.87e-09	7
7923917	FAIM3	NM_005449	6.46e-09	1
8076298	NA	NA	8.9e-09	4
8070665	SIK1	NM_173354	1.21e-08	7
8094789	LIMCH1	NM_014988	1.22e-08	5
8089835	FSTL1	NM_007085	1.28e-08	5
8073194	GRAP2	NM_004810	1.42e-08	1
7896417	NA	NA	1.46e-08	4
7943562	ELMOD1	NM_018712	1.9e-08	3
8126798	GPR116	NM_015234	2.07e-08	3
8124397	HIST1H1C	NM_005319	2.19e-08	6
7929616	FRAT1	NM_005479	2.8e-08	1
8148973	C8orf42	NM_175075	2.92e-08	3
8096314	PKD2	NM_000297	3.52e-08	5
8083260	CPA3	NM_001870	3.87e-08	3
8040249	PDIA6	NM_005742	4.6e-08	7
8100971	PPBP	NM_002704	4.74e-08	1
8106528	NA	ENST00000396129	5.04e-08	7
8081288	TMEM45A	NM_018004	5.98e-08	3
8016438	HOXB2	NM_002145	6.11e-08	7
7896588	NA	NA	6.64e-08	4
7987405	RASGRP1	NM_005739	6.79e-08	1
8088866	CNTN3	NM_020872	7.68e-08	5
8156848	NR4A3	NM_173198	8.2e-08	7
8095422	STATH	NM_003154	8.66e-08	7
7903227	PALMD	NM_017734	9.05e-08	5
8050240	ODC1	NM_002539	9.42e-08	6
8013536	NOS2	NM_000625	9.99e-08	7
8020973	FHOD3	NM_025135	1.01e-07	5
7946676	NA	ENST00000390835	1.04e-07	4
8020847	DTNA	NM_001390	1.06e-07	3
8035801	NA	ENST00000364165	1.08e-07	4
8057797	SDPR	NM_004657	1.25e-07	1
7905028	LSP1	CR541728	1.33e-07	1
8047926	MAP2	NM_002374	1.43e-07	3
8148147	NA	ENST00000459148	1.56e-07	1
8134452	BHLHA15	NM_177455	1.62e-07	4
8155802	GDA	NM_004293	1.65e-07	5
7896702	NA	NA	1.73e-07	7
8082163	NA	ENST00000384275	1.78e-07	4
8016414	SKAP1	NM_003726	1.84e-07	7
8156599	NA	ENST00000362332	2.03e-07	4
8094988	CWH43	NM_025087	2.13e-07	5
8101828	TSPAN5	NM_005723	2.15e-07	1
8162236	SEMA4D	NM_006378	2.27e-07	1
8083429	MBNL1	NM_021038	2.65e-07	1
7975779	FOS	NM_005252	2.99e-07	7
7908376	RGS18	NM_130782	3.09e-07	1
7899753	LCK	NM_005356	3.12e-07	1
7971731	ATP7B	NM_000053	3.19e-07	7
8130408	IPCEF1	NM_001130700	4.01e-07	1
7945648	KRTAP5-2	NM_001004325	4.08e-07	4
7908917	BTG2	NM_006763	4.11e-07	7
7927694	PHYHIPL	NM_032439	4.14e-07	3
7894185	NA	NA	4.2e-07	1
8030391	NA	ENST00000384345	4.38e-07	4
7896720	NA	NA	4.4e-07	7
7895391	NA	NA	4.44e-07	4
8074192	NA	ENST00000391310	4.73e-07	4
8096312	NA	ENST00000365130	4.77e-07	3
8108370	EGR1	NM_001964	4.89e-07	7
8106393	F2R	NM_001992	4.89e-07	7
7995352	NA	NA	5.36e-07	4
8083415	AADAC	NM_001086	5.43e-07	7
8000480	NA	ENST00000384536	5.55e-07	4
7894978	NA	NA	6.04e-07	2
7942267	KRTAP5-10	NM_001012710	6.18e-07	4
8025395	RPS28	NM_001031	6.42e-07	2
7961102	CLEC1B	NM_016509	6.93e-07	1
7919160	NA	ENST00000384378	7.09e-07	7
7919166	NA	ENST00000384378	7.09e-07	7
8172296	NDUFB11	NR_024234	7.29e-07	6
8068353	SLC5A3	NM_006933	7.44e-07	5
8123695	PECI	NM_206836	7.59e-07	5
8016044	ITGA2B	NM_000419	7.99e-07	1
7942824	RPS28	NM_001031	8.22e-07	2
8052416	NA	NA	8.37e-07	4
8059580	DNER	NM_139072	8.42e-07	3
7979902	NA	NA	9.5e-07	4
7909140	NA	AK055340	9.52e-07	4
7989251	NA	ENST00000363448	9.89e-07	4
8029693	FOSB	NM_006732	1e-06	7
7932530	PIP4K2A	NM_005028	1.05e-06	1
7894808	NA	NA	1.07e-06	6
8005471	RPS28	NM_001031	1.19e-06	2
8000706	CDIPT	NM_006319	1.22e-06	1
7973327	MRPL52	NM_181304	1.26e-06	6
8068410	MEMO1	NM_015955	1.27e-06	6
7943526	NA	NA	1.29e-06	4
7934161	PRF1	NM_005041	1.32e-06	1
7895447	NA	NA	1.33e-06	1
7894142	NA	NA	1.36e-06	4
8169365	TMEM164	NM_032227	1.44e-06	1
7933733	FAM13C	NM_198215	1.57e-06	5
8060379	PSMF1	NM_178578	1.61e-06	1
8100966	PF4	NM_002619	1.62e-06	1
8134740	C7orf59	NM_001008395	1.62e-06	6
8063716	TUBB1	NM_030773	1.63e-06	1
7973221	TRAJ17	AK301287	1.63e-06	1
7986214	SLCO3A1	NM_013272	1.64e-06	3
8026163	IER2	NM_004907	1.72e-06	7
7994769	CORO1A	NM_007074	1.76e-06	1
7924603	LBR	NM_002296	1.86e-06	6
7893808	NA	NA	1.87e-06	1
8170412	MAGEA8	NM_005364	1.97e-06	4
7944185	CD3G	NM_000073	1.99e-06	1
8158976	CEL	NM_001807	2.02e-06	3
8139907	NA	ENST00000410496	2.03e-06	4
8116651	NA	ENST00000408316	2.2e-06	7
8024708	MRPL54	NM_172251	2.22e-06	6
7895779	NA	NA	2.23e-06	4
7952056	CD3D	NM_000732	2.24e-06	1
8163775	MEGF9	NM_001080497	2.34e-06	6
7974895	FLJ43390	NR_015358	2.38e-06	3
7902702	CLCA2	NM_006536	2.42e-06	3
7895476	NA	NA	2.43e-06	4
7905054	NA	ENST00000384378	2.5e-06	7
7909455	TRAF3IP3	NM_025228	2.52e-06	1
7907232	C1orf129	NM_025063	2.54e-06	5
8011291	NA	ENST00000411309	2.62e-06	4
8131811	NA	NA	2.68e-06	4
8146115	C8orf4	NM_020130	2.7e-06	7
7995320	NA	NA	2.71e-06	4
7971335	CCDC122	NM_144974	2.72e-06	3
7966749	TESC	NM_017899	3.26e-06	1
8055247	NA	ENST00000391135	3.3e-06	4
8073343	NA	CR605850	3.33e-06	2
8145454	BNIP3L	NM_004331	3.36e-06	1
7963760	NFE2	NM_001136023	3.4e-06	1
7933933	DNAJC12	NM_021800	3.42e-06	7
8119898	VEGFA	NM_001025366	3.44e-06	7
8146669	TRIM55	NM_033058	3.55e-06	3
7894769	NA	NA	3.57e-06	4
7994131	PRKCB	NM_002738	3.69e-06	1
7966690	TBX3	NM_016569	3.75e-06	4
7984475	CORO2B	NM_006091	3.82e-06	5
8043236	GNLY	NM_012483	3.86e-06	1
8180382	KRTAP5-7	NM_001012503	3.94e-06	4
8099471	FGFBP2	NM_031950	3.95e-06	1
8109629	FABP6	NM_001040442	4.03e-06	5
8084880	HES1	NM_005524	4.05e-06	7
7981317	NA	ENST00000439283	4.16e-06	4
7895379	NA	NA	4.39e-06	2
8117510	HMGN4	NM_006353	4.61e-06	7
8019631	NA	NA	4.62e-06	4
8019633	NA	NA	4.62e-06	4
8019635	NA	NA	4.62e-06	4
8019637	NA	NA	4.62e-06	4
8019639	NA	NA	4.62e-06	4
8019641	NA	NA	4.62e-06	4
8019703	NA	NA	4.62e-06	4
8019705	NA	NA	4.62e-06	4
8019707	NA	NA	4.62e-06	4
8117382	HIST1H2BD	NM_021063	4.65e-06	6
8044731	NA	ENST00000363935	4.77e-06	4
8027024	UBA52	NM_001033930	4.85e-06	2
8049073	NA	NA	5.02e-06	2
7944876	NRGN	NM_006176	5.08e-06	1
8019709	NA	NA	5.08e-06	4
8106962	ARSK	NM_198150	5.14e-06	5
7894029	NA	NA	5.16e-06	4
8019802	NA	NA	5.46e-06	4
8116439	SCGB3A1	NM_052863	5.52e-06	7
8077879	SYN2	NM_133625	5.56e-06	4
8065433	C20orf3	NM_020531	5.69e-06	6
8141374	AZGP1	NM_001185	5.7e-06	7
8169792	SH2D1A	NM_002351	6.03e-06	1
7896730	NA	NA	6.11e-06	3
8025828	LDLR	NM_000527	6.15e-06	7
7896691	NA	NA	6.16e-06	1
8075886	IL2RB	NM_000878	6.16e-06	1
8046408	PDK1	NM_002610	6.16e-06	1
8107090	NA	NA	6.17e-06	4
8072610	FBXO7	NM_012179	6.27e-06	1
8124650	UBD	NM_006398	6.28e-06	7
8157650	PTGS1	NM_000962	6.29e-06	1
7962083	NA	NA	6.34e-06	4
8057613	NA	ENST00000363780	6.44e-06	4
7904480	NA	ENST00000383967	6.46e-06	7
7904963	NA	ENST00000383967	6.46e-06	7
8056361	NA	ENST00000411386	6.54e-06	4
8081564	CD96	NM_198196	6.56e-06	1
8058973	ZNF142	NM_001105537	6.61e-06	7
8178295	UBD	NM_006398	6.71e-06	7
7961514	MGP	NM_000900	6.78e-06	3
7974194	NA	NA	6.78e-06	4
7963614	ITGB7	NM_000889	6.79e-06	4
8081537	TRAT1	NM_016388	6.85e-06	1
7895690	NA	NA	7.01e-06	2
7963851	KIAA0748	NM_001098815	7.13e-06	1
7953835	KLRG1	NM_005810	7.28e-06	1
7893395	NA	NA	7.49e-06	8
7971013	NA	ENST00000363003	7.64e-06	4
8123744	F13A1	NM_000129	7.68e-06	1
8105340	GZMA	NM_006144	7.78e-06	1
7937700	KRTAP5-5	NM_001001480	7.85e-06	4
8111153	MYO10	NM_012334	7.91e-06	5
8156371	NA	NA	8.12e-06	4
8088979	VGLL3	NM_016206	8.14e-06	5
7920552	KCNN3	NM_002249	8.29e-06	3
8076561	KIAA1654	AB051441	8.43e-06	4
7917737	NA	ENST00000410931	8.44e-06	4
8163729	NA	hsa-mir-147	8.62e-06	4
8130394	RGS17	NM_012419	8.83e-06	4
7964436	ARHGAP9	NM_032496	9.1e-06	1
8152734	C8orf54	BC137357	9.32e-06	4
8105436	MAP3K1	NM_005921	9.56e-06	6
8027381	NA	ENST00000459344	9.58e-06	4
7901048	SNORD46	NR_000024	9.68e-06	3
8047677	CD28	NM_006139	1e-05	1
8014037	CRLF3	NM_015986	1.02e-05	6
8029969	SEPW1	NM_003009	1.04e-05	6
8105348	GPX8	NM_001008397	1.05e-05	5
8023757	CD226	NM_006566	1.06e-05	1
8160756	DCAF12	NM_015397	1.08e-05	1
8164696	NA	ENST00000391093	1.08e-05	4
7920196	SPRR2D	NM_006945	1.08e-05	7
7893526	NA	NA	1.11e-05	4
8128956	FYN	NM_002037	1.12e-05	1
8110721	ZDHHC11	NM_024786	1.12e-05	3
8023977	GZMM	NM_005317	1.15e-05	4
7928444	VCL	NM_014000	1.16e-05	1
8161044	TPM2	NM_003289	1.16e-05	3
8127193	BMP5	NM_021073	1.19e-05	3
7902883	LRRC8D	NM_001134479	1.21e-05	6
8174891	NA	hsa-mir-220a	1.23e-05	3
8151756	TMEM55A	NM_018710	1.24e-05	1
7906386	PYHIN1	NM_152501	1.24e-05	1
8082406	NA	ENST00000364340	1.26e-05	4
8014316	CCL5	NM_002985	1.27e-05	1
7980861	CATSPERB	NM_024764	1.27e-05	3
8049246	INPP5D	NM_001017915	1.29e-05	1
8099082	NA	ENST00000423673	1.29e-05	4
8084002	KCNMB2	NM_005832	1.3e-05	5
8088369	NA	NA	1.31e-05	4
8175177	MBNL3	NM_018388	1.33e-05	1
8034851	EMR3	NM_032571	1.33e-05	1
8117372	HIST1H2AC	NM_003512	1.34e-05	6
8005064	ARHGAP44	NM_014859	1.35e-05	3
8174338	MORC4	NM_024657	1.36e-05	4
8019183	ACTG1	NM_001614	1.38e-05	1
8080960	NA	ENST00000410309	1.38e-05	4
7972711	NA	ENST00000410750	1.39e-05	4
8109528	CYFIP2	NM_001037332	1.44e-05	1
8086752	SNORD13	NR_003041	1.44e-05	3
7943853	SDHD	NM_003002	1.45e-05	6
8129410	THEMIS	NM_001010923	1.47e-05	1
8052667	NA	ENST00000446086	1.47e-05	4
8116649	TUBB2A	NM_001069	1.47e-05	7
8116653	TUBB2A	NM_001069	1.47e-05	7
8049243	NEU2	NM_005383	1.52e-05	4
8016018	SLC25A39	NM_001143780	1.53e-05	1
8120600	NA	ENST00000384451	1.55e-05	4
8097146	NA	NA	1.56e-05	4
7901336	STRADB	NM_018571	1.59e-05	1
7904361	FAM46C	NM_017709	1.62e-05	1
8071655	CKAP2	BC022822	1.64e-05	4
8111913	NA	ENST00000362617	1.64e-05	4
8104079	FAT1	NM_005245	1.64e-05	5
7899486	TRNAU1AP	NR_003109	1.69e-05	5
8045349	MGAT5	NM_002410	1.69e-05	5
7999553	CPPED1	NM_018340	1.71e-05	6
8000465	NA	ENST00000364501	1.71e-05	8
7947740	NA	NA	1.75e-05	4
7955469	SLC4A8	NM_001039960	1.77e-05	5
8168524	P2RY10	NM_014499	1.79e-05	1
7894824	NA	NA	1.8e-05	1
8033987	ICAM3	NM_002162	1.81e-05	1
7979085	PYGL	NM_002863	1.81e-05	6
7909624	FAM71A	BC035007	1.82e-05	7
8079392	CCR2	NM_001123396	1.83e-05	1
8121087	PM20D2	NM_001010853	1.87e-05	3
7894889	NA	NA	1.87e-05	4
7896602	NA	NA	1.9e-05	4
8119712	SRF	NM_003131	1.9e-05	7
7969736	FARP1	NM_005766	1.91e-05	3
7944970	NA	ENST00000410912	1.92e-05	4
7893061	NA	NA	1.92e-05	6
8057898	HECW2	NM_020760	1.96e-05	7
8068083	C21orf7	NM_020152	1.98e-05	1
8058514	NA	ENST00000390944	2.02e-05	4
7997332	NUDT7	NM_001105663	2.04e-05	5
8126269	TREML1	NM_178174	2.07e-05	1
7905571	S100A9	NM_002965	2.07e-05	1
8169174	RNF128	NM_024539	2.07e-05	5
8054758	DDX11L2	NR_024005	2.08e-05	1
8089519	BTLA	NM_181780	2.1e-05	1
7965423	BTG1	NM_001731	2.13e-05	1
8014891	IKZF3	NM_012481	2.14e-05	1
8141263	KPNA7	NM_001145715	2.16e-05	3
7895424	NA	NA	2.16e-05	4
8155547	LOC442421	NR_024496	2.18e-05	4
8066848	PREX1	NM_020820	2.2e-05	1
7908204	HMCN1	NM_031935	2.2e-05	3
8024436	OAZ1	NM_004152	2.21e-05	1
8038809	NKG7	NM_005601	2.23e-05	1
8021470	PMAIP1	NM_021127	2.25e-05	7
8155930	GCNT1	NM_001490	2.27e-05	6
7897522	RBP7	NM_052960	2.28e-05	1
8180254	KRTAP5-8	NM_021046	2.3e-05	4
8026047	JUNB	NM_002229	2.33e-05	7
7976556	C14orf132	NR_023938	2.35e-05	5
8015590	STAT5B	NM_012448	2.4e-05	1
7981953	SNORD116-3	NR_003318	2.43e-05	3
7981966	SNORD116-3	NR_003318	2.43e-05	3
7979741	NA	ENST00000362568	2.43e-05	4
8174554	NA	ENST00000364550	2.45e-05	4
7948588	SYT7	NM_004200	2.45e-05	4
8162719	HEMGN	NM_018437	2.55e-05	1
8145793	SNORD13	NR_003041	2.55e-05	3
8101637	HSD17B13	NM_178135	2.57e-05	5
7919776	NA	NA	2.57e-05	8
7964460	DDIT3	NM_004083	2.59e-05	7
8053165	MRPL53	NM_053050	2.6e-05	6
8176671	CDY1	NM_170723	2.61e-05	7
8112335	NA	ENST00000364176	2.66e-05	4
8172022	TMEM47	NM_031442	2.66e-05	5
7898655	CDA	NM_001785	2.71e-05	1
7940226	MS4A2	NM_000139	2.76e-05	3
7965484	NA	ENST00000411194	2.83e-05	4
7955768	PFDN5	NM_002624	2.84e-05	6
8068651	PCP4	NM_006198	2.86e-05	3
8143781	GIMAP6	NM_024711	2.87e-05	1
8105481	GAPT	NM_152687	2.94e-05	1
7996744	NFATC3	NM_173163	2.94e-05	6
8139242	NA	ENST00000411326	2.97e-05	4
8143387	MKRN1	NM_013446	3e-05	1
8047443	STRADB	NM_018571	3e-05	1
7981059	SERPINA6	NM_001756	3e-05	3
7948444	TCN1	NM_001062	3.08e-05	7
8077366	LRRN1	NM_020873	3.11e-05	5
7945132	FLI1	NM_002017	3.17e-05	1
7905507	LCE2A	NM_178428	3.17e-05	4
8173933	PCDH19	NM_001105243	3.24e-05	7
7981964	SNORD116-8	NR_003323	3.26e-05	3
7981960	SNORD116-6	NR_003321	3.36e-05	8
7894307	NA	NA	3.41e-05	7
7944179	CD3E	NM_000733	3.47e-05	1
8169263	VSIG1	NM_182607	3.49e-05	1
7920214	SPRR2E	NM_001024209	3.49e-05	7
8148548	PSCA	NM_005672	3.53e-05	7
8003667	SERPINF1	NM_002615	3.57e-05	5
7963289	BIN2	NM_016293	3.61e-05	1
8034514	C19orf43	NM_024038	3.61e-05	1
8076513	NA	ENST00000438558	3.68e-05	4
8020508	RIOK3	NM_003831	3.68e-05	6
7892898	NA	NA	3.81e-05	4
8173135	ALAS2	NM_000032	3.82e-05	1
8124848	IER3	NM_003897	3.83e-05	7
8179704	IER3	NM_003897	3.83e-05	7
7929487	CYP2C9	NM_000771	3.87e-05	4
8121273	NA	ENST00000365516	3.88e-05	4
8083032	NA	ENST00000415794	3.88e-05	7
8134407	DLX6	NM_005222	3.89e-05	4
8054870	NA	ENST00000364714	3.9e-05	4
8005243	NA	ENST00000384132	3.9e-05	8
8028514	EIF3K	NM_013234	3.99e-05	6
7924163	FAM71A	BC035007	3.99e-05	7
8033605	MYO1F	NM_012335	4.03e-05	1
7893191	NA	NA	4.03e-05	4
7892643	NA	NA	4.06e-05	2
7946275	GVIN1	NR_003945	4.08e-05	1
8104014	CCDC110	NM_152775	4.1e-05	5
7896149	NA	NA	4.13e-05	4
7981011	NA	ENST00000365436	4.21e-05	4
8045585	NA	ENST00000384496	4.25e-05	8
7910241	GUK1	NM_000858	4.28e-05	1
8037422	LYPD5	NM_001031749	4.29e-05	4
7921690	ITLN1	NM_017625	4.29e-05	7
7929116	RPP30	NM_006413	4.35e-05	6
8167027	RGN	NM_152869	4.46e-05	3
8020806	RNF125	NM_017831	4.53e-05	1
8099091	NA	ENST00000361653	4.57e-05	4
7988033	EPB42	NM_000119	4.6e-05	1
8053840	NA	ENST00000410187	4.62e-05	4
7904726	TXNIP	NM_006472	4.69e-05	6
7909127	MFSD4	NM_181644	4.69e-05	7
7894818	NA	NA	4.72e-05	4
7954330	SLCO1B3	NM_019844	4.75e-05	7
8090936	NA	ENST00000364455	4.79e-05	4
8007931	ITGB3	NM_000212	4.8e-05	1
8074168	NA	ENST00000400192	4.89e-05	4
7921900	SH2D1B	NM_053282	4.92e-05	1
7909441	G0S2	NM_015714	4.94e-05	3
7971950	DACH1	NM_080759	4.99e-05	3
7969058	NA	ENST00000362506	4.99e-05	4
7965606	HAL	NM_002108	5.03e-05	1
8134351	PPP1R9A	NM_017650	5.15e-05	5
7895842	NA	NA	5.29e-05	6
8170775	SSR4	NM_006280	5.34e-05	6
8084213	NA	ENST00000364359	5.4e-05	3
8095343	STAP1	NM_012108	5.4e-05	3
7930376	NA	ENST00000363209	5.45e-05	4
8046695	ITGA4	NM_000885	5.5e-05	1
8152742	FER1L6	NM_001039112	5.5e-05	4
8025968	ZNF69	NM_021915	5.52e-05	3
7984567	NA	ENST00000363346	5.58e-05	4
8178435	IER3	NM_003897	5.6e-05	7
8176926	CDY1	NM_170723	5.65e-05	7
8177405	CDY1	NM_170723	5.65e-05	7
7972748	NA	ENST00000410652	5.66e-05	4
7895834	NA	NA	5.68e-05	4
7907368	NA	NA	5.72e-05	4
8129562	CTGF	NM_001901	5.84e-05	7
7934916	CH25H	NM_003956	5.87e-05	7
8034454	DHPS	NM_001930	5.89e-05	5
8180346	GPX1	NM_000581	5.97e-05	1
7968062	ATP12A	NM_001676	6e-05	7
7916986	NEGR1	NM_173808	6.01e-05	5
8118826	SNRPC	NM_003093	6.03e-05	6
7980603	NA	NA	6.1e-05	4
7933073	GJD4	NM_153368	6.1e-05	4
8019545	B3GNTL1	NM_001009905	6.13e-05	4
8110520	NA	ENST00000451823	6.17e-05	3
7932733	MKX	NM_173576	6.18e-05	3
8024111	CNN2	NM_004368	6.19e-05	1
7942284	DEFB108B	NM_001002035	6.22e-05	4
8094136	DEFB108B	NM_001002035	6.22e-05	4
8124430	HIST1H1D	NM_005320	6.29e-05	1
7920238	S100A12	NM_005621	6.29e-05	1
8004938	NA	ENST00000420547	6.33e-05	4
7958197	RPL18AP3	NR_001593	6.35e-05	2
7961151	KLRK1	NM_007360	6.37e-05	1
7923885	IKBKE	NM_014002	6.37e-05	4
7911047	NA	NA	6.41e-05	4
8161701	TMEM2	NM_013390	6.41e-05	6
7977452	NA	ENST00000400192	6.42e-05	4
8096032	PRDM8	NM_020226	6.43e-05	3
8036755	CLC	NM_001828	6.48e-05	1
8095870	CCNG2	NM_004354	6.5e-05	1
7995772	MT4	NM_032935	6.5e-05	4
8126760	RCAN2	NM_005822	6.54e-05	3
7899253	ZDHHC18	NM_032283	6.61e-05	1
8000482	XPO6	NM_015171	6.62e-05	6
8074791	MAPK1	NM_002745	6.65e-05	6
7997453	PLCG2	NM_002661	6.7e-05	1
8180384	SPRR2F	NM_001014450	6.77e-05	7
8104613	NA	ENST00000330110	6.83e-05	4
7893731	NA	NA	6.99e-05	4
8171295	NA	ENST00000384117	7.07e-05	4
8077376	ITPR1	NM_001099952	7.15e-05	5
7969364	NA	ENST00000365608	7.22e-05	4
7896292	NA	NA	7.3e-05	1
7916609	JUN	NM_002228	7.45e-05	7
7922219	SELL	NM_000655	7.5e-05	1
8004506	SNORA48	NR_002918	7.51e-05	3
7895100	NA	NA	7.52e-05	4
8128007	GJB7	NM_198568	7.7e-05	5
7893133	NA	NA	7.77e-05	2
7892967	NA	NA	7.96e-05	5
8175330	NA	ENST00000364570	7.97e-05	4
8032480	LSM7	NM_016199	7.98e-05	6
7959078	NA	GENSCAN00000059320	8.08e-05	2
8051372	MEMO1	NM_015955	8.09e-05	6
7980636	EML5	NM_183387	8.13e-05	5
8155323	NA	ENST00000363156	8.24e-05	4
7988281	NA	ENST00000418351	8.25e-05	7
8024299	RPS15	NM_001018	8.41e-05	2
7896687	NA	NA	8.42e-05	1
8177186	CDY1	NM_170723	8.42e-05	7
7983867	CGNL1	NM_032866	8.45e-05	3
8049544	LRRFIP1	NM_001137550	8.49e-05	5
8179224	MUC21	NM_001010909	8.51e-05	7
8037640	NA	hsa-mir-330	8.58e-05	4
7896112	NA	NA	8.62e-05	3
8047771	EEF1B2	NM_001959	8.77e-05	6
7919856	LASS2	NM_181746	8.79e-05	6
8078350	TGFBR2	NM_001024847	8.92e-05	6
8040547	NA	ENST00000437531	9.01e-05	4
8085263	TMEM111	NM_018447	9.1e-05	6
7921677	CD244	NM_016382	9.14e-05	1
8106761	NA	ENST00000384017	9.14e-05	4
8036602	ECH1	NM_001398	9.19e-05	6
8104394	ADCY2	NM_020546	9.22e-05	7
7909283	NA	NA	9.28e-05	1
8084630	NA	BX640843	9.37e-05	3
7894634	NA	NA	9.46e-05	2
8096959	ANK2	NM_001148	9.49e-05	3
8156706	TMOD1	NM_003275	9.9e-05	1
8100347	SCFD2	NM_152540	9.9e-05	6
7896477	NA	NA	9.97e-05	4
7978054	NA	NA	0.000100881	4
7894528	NA	NA	0.000103089	3
8145134	NA	ENST00000364891	0.000104025	4
7974481	NA	AF531436	0.000106074	4
8109507	ITK	NM_005546	0.000106683	1
8124280	FAM65B	NM_014722	0.00010677	1
8041048	FOSL2	NM_005253	0.000107836	7
8043028	NA	NA	0.000107931	4
7980051	C14orf43	NM_194278	0.000108119	4
7894596	NA	NA	0.000108121	1
8052721	PPP3R1	NM_000945	0.000108153	6
8180348	XCL1	NM_002995	0.000108473	1
7903717	NA	hsa-mir-197	0.000108922	4
8151101	MYBL1	NM_001080416	0.000109581	1
7893517	NA	NA	0.000109869	4
7995322	NA	NA	0.000110246	4
7921625	SLAMF6	NM_052931	0.000111113	1
8144894	INTS10	NM_018142	0.00011153	5
7962783	ASB8	NM_024095	0.00011182	6
7941444	CTSW	NM_001335	0.000112347	1
7892673	NA	NA	0.000114003	3
8103725	NA	AK128523	0.00011465	7
8116620	FAM136B	NM_001012983	0.000116575	4
8095504	MUC7	NM_001145006	0.000116908	4
8055135	NA	NA	0.000116941	4
8103873	NA	NA	0.000117153	4
8068671	BACE2	NM_012105	0.000117864	7
7919139	LOC375010	AK090412	0.000118089	3
8147344	PDP1	NM_001161778	0.000118527	7
7908397	RGS13	NM_002927	0.000120892	3
8163618	TNFSF15	NM_005118	0.000121688	3
8132911	NA	NA	0.000122102	4
8171111	SLC25A6	NM_001636	0.000122471	2
8177003	SLC25A6	NM_001636	0.000122471	2
8012908	TEKT3	NM_031898	0.000123263	5
8147848	OXR1	NM_181354	0.000124588	5
8086344	CX3CR1	NM_001337	0.000124665	1
8095834	SHROOM3	NM_020859	0.000124713	3
8168016	NA	NA	0.00012612	8
7981958	SNORD116-5	NR_003320	0.000127189	3
7981962	SNORD116-5	NR_003320	0.000127189	3
8142977	NA	hsa-mir-29b-1	0.00012782	8
8057990	ANKRD44	NM_153697	0.000128156	1
7959123	PRKAB1	NM_006253	0.000128272	7
8012349	PER1	NM_002616	0.000128386	4
7940287	MS4A1	NM_152866	0.000129774	1
8058857	IGFBP5	NM_000599	0.000129777	5
7899534	EPB41	NM_203342	0.000130164	1
7894767	NA	NA	0.000131232	6
8145281	SLC25A37	NM_016612	0.000133233	1
8091530	P2RY12	NM_022788	0.000133555	1
8175455	NA	hsa-mir-504	0.000133944	4
7894699	NA	NA	0.000134136	6
7895880	NA	NA	0.000134773	4
7950762	NA	NA	0.000135653	4
7947423	NA	ENST00000363615	0.000136622	4
8137232	GIMAP8	NM_175571	0.000136969	1
8101762	SNCA	NM_000345	0.000137912	1
8163000	NA	ENST00000363035	0.000137913	4
8109149	PCYOX1L	NM_024028	0.000138151	4
8169158	CXorf57	NM_018015	0.000139035	5
8010050	FAM100B	NM_182565	0.000139633	6
8004024	GP1BA	NM_000173	0.000140008	1
8150087	NA	ENST00000458990	0.000140401	4
8026868	RPL18A	NM_000980	0.000140402	2
7976216	C14orf159	NM_001102366	0.000142484	7
7904287	CD2	NM_001767	0.000142716	1
8151447	IL7	NM_000880	0.00014284	5
8152240	NA	ENST00000364346	0.00014322	8
7995332	NA	NA	0.000143469	4
7999588	PLA2G10	NM_003561	0.000144053	5
8017964	ABCA6	NM_080284	0.000144328	3
7943195	NA	ENST00000384184	0.000144752	8
8151310	EYA1	NM_000503	0.000146856	5
7936673	RGS10	NM_001005339	0.000147567	1
7952601	ETS1	NM_001143820	0.000147843	1
7906128	SLC25A44	NM_014655	0.000149175	1
8151605	REXO1L1	AF495523	0.00014925	4
8151613	REXO1L1	AF495523	0.00014925	4
8151617	REXO1L1	AF495523	0.00014925	4
8151621	REXO1L1	AF495523	0.00014925	4
8151625	REXO1L1	AF495523	0.00014925	4
8053975	LMAN2L	NM_001142292	0.000150845	3
7968361	C13orf26	BC030277	0.000151226	5
8089015	PROS1	NM_000313	0.000152043	5
8082797	TF	NM_001063	0.000155279	7
7902495	NEXN	NM_144573	0.000155319	1
7913883	PAFAH2	NM_000437	0.000158483	1
8115849	NA	NA	0.000159332	4
8093294	CCR2	NM_001123041	0.000159359	1
7894653	NA	NA	0.000161482	4
7925257	LYST	NM_000081	0.000162276	6
7939954	SPRYD5	NM_032681	0.000164204	4
7905589	NA	ENST00000368694	0.000164264	5
7937735	LSP1	NM_002339	0.000164564	1
8035345	INSL3	NM_005543	0.000164801	4
8023862	NA	ENST00000414666	0.000165195	7
8012416	C17orf44	NR_026951	0.000167446	1
8096301	SPP1	NM_001040058	0.000168386	3
8128712	NA	ENST00000363074	0.000169626	8
8117589	HIST1H3H	NM_003536	0.00017041	1
8146955	NA	ENST00000384686	0.000171711	4
8158145	NA	AK057719	0.000172227	4
8100962	NA	NA	0.000172276	4
7953949	KLRD1	NM_002262	0.000172502	1
8036913	BLVRB	NM_000713	0.000175004	1
8035494	FKBP8	NM_012181	0.000175355	1
8007441	RPL27	NM_000988	0.000177273	2
8052087	NA	ENST00000384188	0.000177402	4
8156748	NA	ENST00000364960	0.000178192	8
8171180	NA	ENST00000390912	0.000179428	4
8138091	DAGLB	NM_139179	0.00017955	1
7923528	MYOG	NM_002479	0.000180247	4
8109462	CNOT8	NM_004779	0.000180673	6
7896387	NA	NA	0.000182019	4
8033352	MBD3L2	NM_144614	0.000184613	4
7996281	BEAN	NM_001136106	0.000185921	4
8016739	TOB1	NM_005749	0.000186623	7
8099340	WDR1	NM_017491	0.000187311	6
7946849	NA	ENST00000364716	0.000188058	8
8129482	SAMD3	NM_001017373	0.000190772	1
7998852	TCEB2	NM_007108	0.000190897	6
7926706	NA	ENST00000362665	0.000192242	4
8083677	SCHIP1	NM_014575	0.000192297	5
8134257	GNG11	NM_004126	0.00019404	1
7959173	RNF10	NM_014868	0.000198401	1
8073960	PIM3	NM_001001852	0.000198582	7
8170407	MAGEA9	NM_005365	0.000198678	4
8175611	MAGEA9	NM_005365	0.000198678	4
8012304	TRAPPC1	NM_021210	0.000200014	6
7953333	CD27	NM_001242	0.000200456	4
7892779	NA	NA	0.000200876	4
8175393	ARHGEF6	NM_004840	0.000202661	1
7893973	NA	NA	0.000203625	5
8126770	CYP39A1	NM_016593	0.000204903	5
8078227	KAT2B	NM_003884	0.000204909	1
8141035	SGCE	NM_001099401	0.000205907	3
8136662	MGAM	NM_004668	0.00020618	1
7902594	PRKACB	NM_182948	0.000206349	1
7910164	CABC1	NM_020247	0.000206613	4
8165011	FCN1	NM_002003	0.00020693	1
8097867	KIAA0922	NM_015196	0.000207722	6
8107307	CAMK4	NM_001744	0.000208867	1
8101427	NA	ENST00000362660	0.000209357	3
8100547	NA	AK001150	0.000209907	8
8175664	NA	ENST00000391293	0.000210149	4
7953901	CLEC12A	NM_138337	0.000210247	1
8109333	GPX3	NM_002084	0.000211421	5
8034448	C19orf56	NM_016145	0.000211523	6
7893122	NA	NA	0.000211863	4
8165217	NOTCH1	NM_017617	0.000211927	7
7895321	NA	NA	0.000213624	3
8125038	LY6G6E	NR_003673	0.000214589	4
8178582	LY6G6E	NR_003673	0.000214589	4
8179810	LY6G6E	NR_003673	0.000214589	4
8000757	DOC2A	NM_003586	0.000215531	3
8097936	NA	NA	0.000216115	4
8114733	ARAP3	NM_022481	0.0002167	4
8160769	NA	NA	0.000218183	4
8095680	IL8	NM_000584	0.000218594	3
8106017	NA	ENST00000459129	0.000220091	8
8034589	FARSA	NM_004461	0.000220252	7
7951178	TRPC6	NM_004621	0.000223524	3
7917232	GNG5	NM_005274	0.00022381	1
7999362	NA	ENST00000363598	0.000225848	4
8168868	ARMCX1	NM_016608	0.000232326	3
7922326	NA	hsa-mir-214	0.000234363	4
7905505	LCE2B	NM_014357	0.000234646	4
7923503	ADIPOR1	NM_015999	0.000235151	1
8170479	VMA21	NM_001017980	0.000236167	1
8074845	ZNF280B	NM_080764	0.00023684	7
7984538	NA	NA	0.000237379	4
8079074	SS18L2	NM_016305	0.000237739	6
7899849	NA	ENST00000401937	0.000238297	4
8045319	NA	ENST00000391310	0.00023938	4
8055234	NA	ENST00000391310	0.00023938	4
8032410	MOBKL2A	NM_130807	0.000240469	1
8015196	KRTAP1-1	NM_030967	0.00024257	4
8019578	KRTAP1-1	NM_030967	0.00024257	4
8063014	WFDC13	NM_172005	0.000246142	4
8079165	NA	hsa-mir-138-1	0.000248331	4
7973314	OXA1L	NM_005015	0.000248797	6
7979483	C14orf39	NM_174978	0.00024967	5
8146839	C8orf34	BC041961	0.000250395	5
8107996	NA	ENST00000364404	0.000250689	4
7965156	LIN7A	NM_004664	0.000251913	1
8088247	ARHGEF3	NM_001128615	0.000254862	1
7894970	NA	NA	0.000256133	3
7986327	NA	NA	0.000258937	4
7894097	NA	NA	0.000259489	4
8065278	LOC643659	AK056971	0.000262359	4
8016600	TAC4	NM_170685	0.000262923	4
7892579	NA	NA	0.000264975	2
8143385	NA	ENST00000365602	0.000265323	4
7938485	MICAL2	NM_014632	0.000265882	1
8004861	ODF4	NM_153007	0.000266291	4
8088106	TKT	NM_001135055	0.00026638	1
7986092	FURIN	NM_002569	0.000267223	7
7894732	NA	NA	0.000267319	2
8070867	NA	ENST00000416043	0.000269647	4
7911659	KIAA1751	NM_001080484	0.000277314	3
8102998	GYPA	NM_002099	0.000278399	1
8122860	MYCT1	NM_025107	0.000281616	5
7894568	NA	NA	0.000281809	4
8151629	NA	NA	0.00028186	4
8051319	NA	AY358806	0.00028244	4
8002194	DPEP2	NM_022355	0.000282461	1
8064613	SLC4A11	NM_032034	0.000283604	7
8004940	C17orf48	NM_020233	0.000284295	6
7979444	NA	ENST00000281581	0.000284503	3
7896073	NA	NA	0.000284827	4
7961363	NA	ENST00000384283	0.000285677	8
8058496	NA	ENST00000362381	0.000286174	8
8168531	GPR174	NM_032553	0.000287147	1
7937698	KRTAP5-1	NM_001005922	0.00028831	4
8075657	NA	NA	0.000288839	4
8001776	NA	ENST00000459367	0.000290439	8
8007130	KRTAP9-8	NM_031963	0.00029086	4
7998414	NA	ENST00000428636	0.000292107	4
7971124	UFM1	NM_016617	0.000292434	3
7911897	C1orf174	NM_207356	0.000292766	7
8117408	HIST1H2AE	NM_021052	0.000293807	6
7896373	NA	NA	0.000296551	8
7893438	NA	NA	0.000297393	4
7924819	NA	ENST00000408153	0.000297531	4
7987385	MEIS2	NM_172316	0.000297588	5
7920382	CRTC2	NM_181715	0.000298013	1
7948267	TIMM10	NM_012456	0.000299123	6
8145634	NA	NA	0.000299944	3
8154512	ADAMTSL1	NM_001040272	0.0003011	4
7921014	MEF2D	NM_005920	0.000301148	8
8140356	NA	AY358103	0.000305778	4
8014063	EVI2B	NM_006495	0.000306438	1
8085786	NA	ENST00000390967	0.000306882	8
7896630	NA	NA	0.000307013	4
8107096	NA	ENST00000324151	0.000309479	7
8087611	HYAL1	NM_007312	0.000309663	4
7939418	NA	ENST00000364721	0.000309718	4
8080985	NA	ENST00000411315	0.000310907	4
8164607	FNBP1	NM_015033	0.000312507	1
8142345	DOCK4	NM_014705	0.000312744	5
8059854	ARL4C	NM_005737	0.000314346	1
7990827	NA	ENST00000447682	0.000314649	4
8118069	MUC21	NM_001010909	0.000316189	7
7998655	RPS2	NM_002952	0.000316902	2
8068898	HIST1H2BK	NM_080593	0.00031694	6
7960518	TNFRSF1A	NM_001065	0.000317067	1
8126310	NA	ENST00000384018	0.000317762	8
8072272	NA	ENST00000364106	0.000317832	4
7954940	PPHLN1	NM_016488	0.000320367	6
8094441	SLC34A2	NM_006424	0.000320729	5
7985767	AEN	NM_022767	0.000321451	4
8042972	NA	NA	0.00032301	4
7987097	NA	hsa-mir-211	0.000324916	4
8065693	NECAB3	NM_031232	0.000325685	4
8009585	DNAI2	NM_023036	0.000326713	3
7894471	NA	NA	0.000329132	6
8052803	AAK1	NM_014911	0.000329163	6
7900426	SMAP2	NM_022733	0.00032937	6
7966127	SELPLG	NM_003006	0.000330334	1
8065069	NA	NA	0.000330899	4
7961059	KLRB1	NM_002258	0.00033303	1
8018982	CANT1	NM_138793	0.000335876	7
7930861	CASC2	NR_026939	0.000336707	5
7906475	FCRL6	NM_001004310	0.0003399	1
8116335	C5orf45	NM_016175	0.000340175	3
7972336	DZIP1	NM_198968	0.000342038	5
7916506	C1orf168	NM_001004303	0.000342235	5
8015218	KRTAP4-8	NM_031960	0.000344161	4
8040477	NA	ENST00000363959	0.000345971	8
8110166	HIGD2A	NM_138820	0.000346323	6
8008885	NA	hsa-mir-21	0.000348181	7
7930398	MXI1	NM_005962	0.00034826	1
8066411	NA	ENST00000372910	0.000348262	4
8145291	SLC25A37	AF495725	0.000349034	1
8095574	DCK	NM_000788	0.000350535	1
7898585	NBL1	NM_182744	0.000351465	4
8126905	CRISP3	NM_006061	0.000351488	7
8148158	WDR67	NM_145647	0.000352864	6
7914992	NA	NA	0.000352991	4
8038716	KLK9	NM_012315	0.000353753	4
8113717	NA	BC029465	0.000355849	3
8011328	NA	GENSCAN00000054703	0.00035732	4
8031293	KIR2DL3	NM_014511	0.000360046	1
7999642	KIAA0430	NM_014647	0.000360416	6
7976863	PPP2R5C	NM_001161725	0.000360846	6
7905548	SPRR3	NM_005416	0.000362566	7
8172905	HSD17B10	NM_004493	0.000365406	6
7905058	LOC388692	NR_027002	0.000367837	4
8095380	TMPRSS11E	NM_014058	0.00037102	3
8044021	IL1RL1	NM_016232	0.000371236	3
7914021	SLC9A1	NM_003047	0.000371798	1
8172270	NA	NA	0.000372938	4
7990033	TLE3	NM_005078	0.000374927	7
8012004	NA	hsa-mir-195	0.000375817	4
8163002	KLF4	NM_004235	0.000378417	7
8134339	PEG10	NM_015068	0.000378648	3
8042168	KIAA1841	NM_001129993	0.000380407	5
8081386	NFKBIZ	NM_031419	0.000380983	7
8000791	YPEL3	NM_031477	0.000385505	1
7896615	NA	NA	0.000386969	4
7905929	EFNA1	NM_004428	0.000387065	7
8051298	GALNT14	NM_024572	0.000387244	7
7954492	FGFR1OP2	NM_015633	0.000388507	1
8063566	RAE1	NM_003610	0.000388679	5
8124492	HIST1H2BK	NM_080593	0.000389158	6
8085300	SEC13	NR_024272	0.000390495	6
7928870	NA	ENST00000363306	0.000392118	4
8122600	STXBP5	NM_001127715	0.000393811	6
8154392	NA	ENST00000365020	0.000395232	4
8029129	RPS19	NM_001022	0.000396349	2
7916541	DAB1	NM_021080	0.000399929	4
7909811	NA	NA	0.000400082	4
8030368	RPS11	NM_001015	0.000401601	2
8150872	RPS20	NM_001023	0.000403408	2
8138789	JAZF1	NM_175061	0.000403762	1
8138155	NA	ENST00000364348	0.000405995	4
8093500	TACC3	NM_006342	0.000406226	1
8065122	NA	ENST00000390863	0.000407907	4
8023061	NA	NA	0.000411349	8
8007112	KRTAP4-9	NM_001146041	0.000412054	4
8061504	DEFB115	NM_001037730	0.000413061	4
8049990	FAM150B	NM_001002919	0.000413655	4
8170390	IDS	NM_000202	0.000416994	3
7951591	NA	ENST00000363298	0.000417015	4
8036557	NA	NA	0.000417335	6
7958466	ACACB	NM_001093	0.00041782	3
7955817	PCBP2	NM_005016	0.000418705	6
8044109	POU3F3	NM_006236	0.000420249	4
8143132	LUZP6	NM_001128619	0.000420806	6
8081820	NA	ENST00000384162	0.000427544	8
8105331	GZMK	NM_002104	0.000430884	1
8043504	MAL	NM_002371	0.000432143	7
8177931	MUC21	NM_001010909	0.000437286	7
7895918	NA	NA	0.000438393	2
8004247	C17orf49	NM_001142798	0.000442372	6
8044375	BCL2L11	NM_138621	0.000442437	7
8110499	RUFY1	NM_025158	0.000442704	6
8140227	NCF1	NM_000265	0.000443115	1
8133518	NCF1	NM_000265	0.000448263	1
8171890	NA	ENST00000364486	0.000449716	4
8015991	SLC4A1	NM_000342	0.000450934	1
8085370	GSTM5P1	NR_003112	0.000452038	4
8020760	NA	ENST00000384511	0.000452103	4
7893205	NA	NA	0.000452494	7
8139107	TARP	AK056843	0.000453636	1
7952129	RPS25	NM_001028	0.000455356	2
8049195	NA	NA	0.000456883	4
7894682	NA	NA	0.000458415	2
7914094	WASF2	NM_006990	0.00045966	6
8133314	NCF1	NM_000265	0.000460246	1
7909626	NA	ENST00000384760	0.000460396	8
8019507	C17orf62	NM_001100407	0.000461177	4
7895392	NA	NA	0.000462069	4
8149258	MFHAS1	NM_004225	0.000462211	7
7907773	TOR1AIP1	NM_015602	0.000462556	6
8045321	POTEF	NM_001099771	0.000463528	7
7896456	NA	NA	0.00046717	6
8100798	SULT1B1	NM_014465	0.000467799	1
8080619	NA	ENST00000363368	0.000469095	4
8105191	PARP8	NM_024615	0.000470864	6
7941505	CST6	NM_001323	0.000471479	3
7896312	NA	NA	0.000475286	4
8125734	DAXX	NM_001141969	0.000475841	1
8113008	NA	ENST00000384721	0.000479742	8
8070295	NA	ENST00000459411	0.000480499	3
7976012	NRXN3	NM_004796	0.000483003	5
7992402	NDUFB10	NM_004548	0.000483382	6
8038029	CARD8	NM_014959	0.000486315	1
8094301	SLIT2	NM_004787	0.000488469	5
8107855	RNU6ATAC	NR_023344	0.000490139	8
8091283	PLOD2	NM_182943	0.000491352	5
7909425	CAMK1G	NM_020439	0.000491979	4
7892564	NA	NA	0.000494221	1
7991453	FAM174B	NM_207446	0.000494405	3
8052143	GPR75	NM_006794	0.00049459	3
8009094	NA	ENST00000416490	0.000494896	4
8146754	NA	NA	0.000495749	3
8070925	NA	ENST00000455651	0.000496565	4
7895862	NA	NA	0.000499327	4
7910186	NA	ENST00000408153	0.000499857	4
7926127	CELF2	NM_001025077	0.000502532	1
7893564	NA	NA	0.000503172	2
7892751	NA	NA	0.000504982	4
7923436	NA	ENST00000364233	0.000506684	8
7947462	ABTB2	NM_145804	0.000507859	4
8035234	NA	ENST00000411200	0.000508182	4
8180284	RPL13	NM_000977	0.000508469	2
8095364	TMPRSS11E	NM_014058	0.000509865	3
8115327	SPARC	NM_003118	0.000510842	1
7985099	PSTPIP1	NM_003978	0.000510868	1
8013331	B9D1	NM_015681	0.000511593	3
7923164	ATP6V1G3	NM_133326	0.000513135	3
8036902	SERTAD1	NM_013376	0.000513268	7
8124406	HIST1H2BC	NM_003526	0.000516954	6
7896715	NA	NA	0.000523487	1
8025850	DOCK6	NM_020812	0.00052716	4
7917752	NA	ENST00000391299	0.000528734	4
8132819	IKZF1	NM_006060	0.000529011	1
7938834	NAV2	NM_182964	0.000534373	3
7942877	NA	ENST00000383856	0.000536382	8
8100210	TXK	NM_003328	0.000537222	1
7995338	NA	NA	0.00053786	4
7895632	NA	NA	0.000540947	4
8028162	TBCB	NM_001281	0.00054274	6
8118061	DPCR1	NM_080870	0.000545359	4
8018305	HN1	NM_016185	0.000546647	1
8099924	NA	ENST00000314232	0.00054828	4
7952735	NA	AF119851	0.000550259	4
8139055	NA	ENST00000410857	0.000551553	4
7986757	NDN	NM_002487	0.000553152	5
8106743	VCAN	NM_004385	0.000553551	1
7919637	HIST2H2BE	NM_003528	0.000553589	6
8163535	AMBP	NM_001633	0.00055532	4
7920244	S100A8	NM_002964	0.000556147	1
8149116	DEFA3	NM_005217	0.000556233	1
8149126	DEFA3	NM_005217	0.000556233	1
8149137	DEFA3	NM_005217	0.000556233	1
7893384	NA	NA	0.000556575	8
8029831	CALM3	NM_005184	0.000557008	6
7892817	NA	NA	0.000557943	2
8164596	C9orf78	NM_016520	0.000560854	1
8048211	RUFY4	NM_198483	0.00056137	4
8012823	SCO1	NM_004589	0.000562353	6
7976451	PPP4R4	NM_058237	0.000563183	5
8056583	ABCB11	NM_003742	0.000564347	7
8094778	UCHL1	NM_004181	0.000565385	3
8164644	FAM78A	NM_033387	0.000568045	1
7895757	NA	NA	0.000570231	4
7913169	CAPZB	NM_004930	0.000570821	6
8016033	FAM171A2	NM_198475	0.000571382	4
7931930	PRKCQ	NM_006257	0.000572246	1
7972810	CARS2	NM_024537	0.000574159	6
7959586	SNRNP35	NM_180699	0.00057771	3
8062687	NA	ENST00000410623	0.000578696	4
8069508	NA	ENST00000333394	0.000579564	3
8176091	LOC158960	BC009467	0.000580395	3
8061562	NA	ENST00000364900	0.000584317	8
7995328	NA	NA	0.000587227	4
8042251	OTX1	NM_014562	0.000588338	4
8135218	LRRC17	NM_005824	0.00059005	7
7920971	C1orf85	NM_144580	0.000590127	1
8089011	PROS1	NM_000313	0.000591423	5
8046646	OSBPL6	NM_032523	0.000591514	5
8102993	GYPB	NM_002100	0.000593133	1
8135874	NA	NA	0.000594084	4
7996313	CMTM2	NM_144673	0.000594871	1
8108629	VTRNA1-2	NR_026704	0.000595681	8
8078442	CCR4	NM_005508	0.00060335	1
8048699	NA	AK056734	0.000603864	4
8054281	LONRF2	NM_198461	0.000604235	5
7970844	KATNAL1	NM_001014380	0.000604351	5
8027642	PDCD2L	NM_032346	0.000604666	6
8032375	C19orf34	NM_152771	0.00060501	4
8138997	TBX20	NM_001077653	0.000606196	4
7915841	KNCN	NM_001097611	0.000609922	4
8123524	EXOC2	NM_018303	0.000611148	6
8094408	ANAPC4	NM_013367	0.000611474	5
8151559	SLC10A5	NM_001010893	0.00061303	7
7981181	SCARNA13	NR_003002	0.000621141	3
8165271	LCN10	NM_001001712	0.000621811	4
8045224	FAM123C	NM_152698	0.000622297	4
8047062	C2orf88	NM_001042519	0.000625903	1
7917954	FRRS1	NM_001013660	0.000627243	5
7928019	HK1	NM_033500	0.000627647	7
8082133	PDIA5	NM_006810	0.000629036	7
8010770	SLC16A3	NM_001042422	0.000630381	4
8111922	NA	ENST00000314957	0.000631847	3
8137151	SSPO	NM_198455	0.000634588	4
8031475	TMEM190	NM_139172	0.000634961	5
7895604	NA	NA	0.000638543	6
8016982	SUPT4H1	NM_003168	0.000642714	6
8056763	NA	ENST00000433675	0.000643122	2
7975268	ARG2	NM_001172	0.000644319	7
8058912	NA	ENST00000459620	0.000650289	4
8137244	GIMAP4	NM_018326	0.000656646	1
8154357	NA	ENST00000441944	0.000659313	1
8100097	GABRG1	NM_173536	0.000661325	3
7893546	NA	NA	0.00066285	4
7892986	NA	NA	0.000664248	2
8131970	EVX1	NM_001989	0.000664395	4
8140967	SAMD9	NM_017654	0.000669616	1
8017671	LOC146880	NR_026899	0.000670473	4
7903884	PROK1	NM_032414	0.000670904	4
8161024	RMRP	NR_003051	0.00067665	3
8063380	NA	ENST00000383983	0.000676676	8
7895623	NA	NA	0.000677813	8
8067944	NA	hsa-let-7c	0.000679541	3
7897860	TNFRSF8	NM_001243	0.000681061	4
8102532	PDE5A	NM_001083	0.000682609	1
7921667	CD48	NM_001778	0.000682906	1
8029958	GLTSCR2	NM_015710	0.000682994	7
7996772	SLC7A6	NM_003983	0.00068326	5
8113130	MCTP1	NM_024717	0.000685067	6
8140739	TP53TG1	AB007455	0.00068539	6
7893931	NA	NA	0.000686078	3
8180179	DAXX	NM_001141969	0.000686245	1
8008965	NA	NA	0.000690804	4
7899220	ARID1A	NM_006015	0.000691314	7
8091523	P2RY13	NM_176894	0.000693319	1
8006627	ZNHIT3	NM_004773	0.000693544	6
8015152	KRT40	NM_182497	0.000695394	7
8019604	KRT40	NM_182497	0.000695394	7
8068180	HUNK	NM_014586	0.000696145	3
7905559	LELP1	NM_001010857	0.000700781	4
8079662	ARIH2	NM_006321	0.000701419	5
7905283	ANXA9	NM_003568	0.000706183	4
8098470	WWC2	NM_024949	0.000707062	6
8132667	ADCY1	NM_021116	0.000707237	4
8165794	CD99	NM_002414	0.000707996	6
8176360	CD99	NM_002414	0.000707996	6
8144810	NA	ENST00000390978	0.000708199	4
8162247	NA	AF289567	0.000708755	4
7896233	NA	NA	0.000709289	3
7905355	SCNM1	NM_024041	0.000710878	6
8045563	ARHGAP15	NM_018460	0.000711423	1
7996290	CMTM1	NM_052999	0.000713015	1
8044295	SH3RF3	NM_001099289	0.000713848	4
8013348	RPS2	NM_002952	0.000715436	2
7945418	NA	ENST00000410806	0.000716277	4
8020162	AMAC1L2	NM_054028	0.000717577	4
7922040	CD247	NM_198053	0.000718527	1
8039096	NLRP12	NM_144687	0.000719256	1
7953385	GAPDH	NM_002046	0.000720827	1
8052674	NA	ENST00000363094	0.000724197	4
8094165	HSP90AB2P	NR_003132	0.000724836	3
7950078	KRTAP5-11	NM_001005405	0.000724961	4
8174692	SEPT6	NM_145799	0.000726067	1
7896281	NA	NA	0.000726598	8
8115234	ANXA6	NM_001155	0.000733781	1
8038643	KLK15	NM_017509	0.000739277	4
8151816	GEM	NM_005261	0.000740302	7
8096290	MEPE	NM_020203	0.000742274	5
7895510	NA	NA	0.00074267	1
8069450	PRMT2	NM_206962	0.000743179	6
7950299	DNAJB13	NM_153614	0.000743731	3
7939959	OR5AS1	NM_001001921	0.000745467	4
7893953	NA	NA	0.000745896	4
7985037	NA	ENST00000411032	0.000745964	4
7919146	ANKRD20B	NR_003366	0.000746826	3
8013465	KRT16	NM_005557	0.000747731	4
7900159	DNALI1	NM_003462	0.000750065	3
7966268	GIT2	NM_057169	0.000753488	6
7934215	SPOCK2	NM_014767	0.000754789	4
8011499	P2RX1	NM_002558	0.000756175	7
7924619	ENAH	NM_001008493	0.000758205	5
7945774	SLC22A18AS	NM_007105	0.000758441	4
7947526	NA	ENST00000333983	0.000760919	4
7910591	C1orf57	NM_032324	0.00076185	6
8010901	DOC2B	NM_003585	0.000762809	4
7895920	NA	NA	0.000767026	4
7926934	NA	ENST00000383933	0.000770191	4
8061416	CST7	NM_003650	0.000770454	1
7909214	RASSF5	NM_182663	0.000770518	1
8104928	NA	ENST00000410246	0.000773999	3
7924756	NA	NA	0.000775458	4
7949104	RASGRP2	NM_001098671	0.000777653	1
8178991	DAXX	NM_001141969	0.000779234	1
8075009	C22orf13	NM_031444	0.000780808	1
8071301	C22orf25	NM_152906	0.000782098	1
8171240	VCX2	NM_016378	0.000782289	4
7957260	GLIPR1	NM_006851	0.000783251	1
8124448	HIST1H4H	NM_003543	0.000791085	6
7914938	NA	ENST00000364578	0.000791869	8
8170198	LOC100132625	AK098726	0.000791893	3
7955076	NA	ENST00000419998	0.000794228	4
8012028	ASGR2	NM_080912	0.000797984	4
7898070	PRDM2	NM_012231	0.000798152	5
7979800	NA	ENST00000411123	0.000798699	8
8170998	F8A1	NM_012151	0.000800683	1
8121632	KPNA5	NM_002269	0.000801712	5
8104725	NA	NA	0.000806026	4
7953878	CLEC2D	NM_001004419	0.000809713	1
7981949	SNORD116-1	NR_003316	0.000810296	3
8050093	NA	NA	0.000811075	4
8122554	RAB32	NM_006834	0.000811378	1
8101086	NAAA	NM_014435	0.000814279	6
8011884	NLRP1	NM_033004	0.000814513	1
8042416	ARHGAP25	NM_014882	0.000814841	1
8077116	ODF3B	NM_001014440	0.000815546	3
7964660	AVPR1A	NM_000706	0.000817866	3
8103695	MFAP3L	NM_021647	0.000819393	1
8034901	OR7A17	NM_030901	0.000820238	4
8120011	SPATS1	NM_145026	0.000820394	5
8110821	SLC6A3	NM_001044	0.000820896	4
7979671	MAX	NM_145113	0.000821504	1
8154777	NA	NA	0.000822928	4
7983991	FAM81A	NM_152450	0.000825646	3
7937936	NA	AF359417	0.000825883	4
7995340	NA	NA	0.000826016	4
7953892	KLRF1	NM_016523	0.000826396	1
8010061	SPHK1	NM_182965	0.000828599	4
8077663	JAGN1	NM_032492	0.000829557	6
8142730	ZNF800	NM_176814	0.000830076	6
8071806	DDT	NM_001355	0.000830343	6
8097307	INTU	NM_015693	0.000830445	5
8127201	COL21A1	NM_030820	0.000830632	3
8112592	FOXD1	NM_004472	0.000831118	4
7906377	MNDA	NM_002432	0.000832375	1
7988444	MYEF2	NM_016132	0.000832787	5
7939184	TCP11L1	NM_018393	0.000833831	7
8173825	RPS6KA6	NM_014496	0.000835987	5
8149109	DEFA4	NM_001925	0.000837481	1
7895239	NA	NA	0.000837602	4
7986001	NA	ENST00000338706	0.00083882	4
8043363	NCRNA00152	NR_024204	0.000838977	1
7934767	DYDC1	NM_138812	0.000841345	5
7901634	C1orf175	NR_026782	0.000842484	4
8033043	FUT6	NM_000150	0.000844634	4
8130768	RNASET2	NM_003730	0.000849774	1
8115158	RPS14	NM_001025071	0.000849803	2
8155754	MAMDC2	NM_153267	0.000853149	3
8180260	BANF1	NM_003860	0.000854843	6
7975408	NA	NA	0.000858523	8
8001030	PYCARD	NM_013258	0.000858951	1
8132646	CCM2	NM_031443	0.000860052	7
8046283	GAD1	NM_000817	0.000860209	3
7970565	NA	NA	0.000861073	4
7896421	NA	NA	0.000863238	7
8137240	GIMAP7	NM_153236	0.000863706	1
7949518	FIBP	NM_198897	0.000864019	6
8110318	PRELID1	NM_013237	0.00086731	1
8075981	C22orf23	AF324466	0.00086816	3
7903162	TMEM56	NM_152487	0.000869512	1
8145555	SCARA3	NM_016240	0.000870801	3
8113881	RAPGEF6	NM_016340	0.000872403	6
8067867	NA	ENST00000364942	0.000874135	4
7892859	NA	NA	0.000874182	4
7923967	YOD1	NM_018566	0.000874523	1
7969772	NA	NA	0.000875479	4
7908409	RGS2	NM_002923	0.000877238	1
8014551	SYNRG	NM_007247	0.000877692	6
8149720	EGR3	NM_004430	0.000880387	7
8146239	NA	NA	0.000885436	4
8150842	NA	ENST00000433609	0.000886251	4
7894513	NA	NA	0.000888656	2
8055664	NA	ENST00000390879	0.000889827	4
8013319	GRAP	NM_006613	0.000892074	1
8097017	UGT8	NM_001128174	0.000893141	3
8097459	NA	NA	0.000893372	8
8009353	PITPNC1	NM_181671	0.000894602	1
8018377	NA	ENST00000411285	0.00089735	8
7923233	KIF21B	NM_017596	0.000897472	4
8153903	RPL8	NM_000973	0.000897938	2
8014066	EVI2A	NM_001003927	0.00089952	1
8046160	KBTBD10	NM_006063	0.000899675	5
8024194	GPX4	NM_002085	0.000900271	6
8169709	GLRX5	NM_016417	0.000900613	1
8171846	NA	ENST00000419089	0.000900758	6
8144378	AGPAT5	NM_018361	0.000901278	5
7896519	NA	NA	0.000901733	4
8096617	BANK1	NM_017935	0.000901743	1
7892868	NA	NA	0.000902745	2
8114489	NA	NA	0.000903214	8
8047403	CASP10	NM_032977	0.000903974	7
