# Supplementary material for: Characterizing the Molecular Spatial and Temporal Field of Injury in Early-Stage Smoker Non–Small Cell Lung Cancer Patients after Definitive Surgery by Expression Profiling
Source: Oxford University Press journal article supplement (doi:10.1158/1940-6207.capr-12-0290), 2012-10-19
Supplement: 19406207capr120290-sup-tab2.xlsx [file 19406207capr120290-sup-tab2.xlsx]

## Sheet: Sheet1
Supplementary Table 2
UNIQID	Symbol	Accession	p-value
7923917	FAIM3	NM_005449	6.46e-09
8073194	GRAP2	NM_004810	1.42e-08
7929616	FRAT1	NM_005479	2.8e-08
8100971	PPBP	NM_002704	4.74e-08
7987405	RASGRP1	NM_005739	6.79e-08
8057797	SDPR	NM_004657	1.25e-07
7905028	LSP1	CR541728	1.33e-07
8148147	NA	ENST00000459148	1.56e-07
8101828	TSPAN5	NM_005723	2.15e-07
8162236	SEMA4D	NM_006378	2.27e-07
8083429	MBNL1	NM_021038	2.65e-07
7908376	RGS18	NM_130782	3.09e-07
7899753	LCK	NM_005356	3.12e-07
8130408	IPCEF1	NM_001130700	4.01e-07
7894185	NA	NA	4.2e-07
7961102	CLEC1B	NM_016509	6.93e-07
8016044	ITGA2B	NM_000419	7.99e-07
7932530	PIP4K2A	NM_005028	1.05e-06
8000706	CDIPT	NM_006319	1.22e-06
7934161	PRF1	NM_005041	1.32e-06
7895447	NA	NA	1.33e-06
8169365	TMEM164	NM_032227	1.44e-06
8060379	PSMF1	NM_178578	1.61e-06
8100966	PF4	NM_002619	1.62e-06
8063716	TUBB1	NM_030773	1.63e-06
7973221	TRAJ17	AK301287	1.63e-06
7994769	CORO1A	NM_007074	1.76e-06
7893808	NA	NA	1.87e-06
7944185	CD3G	NM_000073	1.99e-06
7952056	CD3D	NM_000732	2.24e-06
7909455	TRAF3IP3	NM_025228	2.52e-06
7966749	TESC	NM_017899	3.26e-06
8145454	BNIP3L	NM_004331	3.36e-06
7963760	NFE2	NM_001136023	3.4e-06
7994131	PRKCB	NM_002738	3.69e-06
8043236	GNLY	NM_012483	3.86e-06
8099471	FGFBP2	NM_031950	3.95e-06
7944876	NRGN	NM_006176	5.08e-06
8169792	SH2D1A	NM_002351	6.03e-06
7896691	NA	NA	6.16e-06
8075886	IL2RB	NM_000878	6.16e-06
8046408	PDK1	NM_002610	6.16e-06
8072610	FBXO7	NM_012179	6.27e-06
8157650	PTGS1	NM_000962	6.29e-06
8081564	CD96	NM_198196	6.56e-06
8081537	TRAT1	NM_016388	6.85e-06
7963851	KIAA0748	NM_001098815	7.13e-06
7953835	KLRG1	NM_005810	7.28e-06
8123744	F13A1	NM_000129	7.68e-06
8105340	GZMA	NM_006144	7.78e-06
7964436	ARHGAP9	NM_032496	9.1e-06
8047677	CD28	NM_006139	1e-05
8023757	CD226	NM_006566	1.06e-05
8160756	DCAF12	NM_015397	1.08e-05
8128956	FYN	NM_002037	1.12e-05
7928444	VCL	NM_014000	1.16e-05
8151756	TMEM55A	NM_018710	1.24e-05
7906386	PYHIN1	NM_152501	1.24e-05
8014316	CCL5	NM_002985	1.27e-05
8049246	INPP5D	NM_001017915	1.29e-05
8175177	MBNL3	NM_018388	1.33e-05
8034851	EMR3	NM_032571	1.33e-05
8019183	ACTG1	NM_001614	1.38e-05
8109528	CYFIP2	NM_001037332	1.44e-05
8129410	THEMIS	NM_001010923	1.47e-05
8016018	SLC25A39	NM_001143780	1.53e-05
7901336	STRADB	NM_018571	1.59e-05
7904361	FAM46C	NM_017709	1.62e-05
8168524	P2RY10	NM_014499	1.79e-05
7894824	NA	NA	1.8e-05
8033987	ICAM3	NM_002162	1.81e-05
8079392	CCR2	NM_001123396	1.83e-05
8068083	C21orf7	NM_020152	1.98e-05
8126269	TREML1	NM_178174	2.07e-05
7905571	S100A9	NM_002965	2.07e-05
8054758	DDX11L2	NR_024005	2.08e-05
8089519	BTLA	NM_181780	2.1e-05
7965423	BTG1	NM_001731	2.13e-05
8014891	IKZF3	NM_012481	2.14e-05
8066848	PREX1	NM_020820	2.2e-05
8024436	OAZ1	NM_004152	2.21e-05
8038809	NKG7	NM_005601	2.23e-05
7897522	RBP7	NM_052960	2.28e-05
8015590	STAT5B	NM_012448	2.4e-05
8162719	HEMGN	NM_018437	2.55e-05
7898655	CDA	NM_001785	2.71e-05
8143781	GIMAP6	NM_024711	2.87e-05
8105481	GAPT	NM_152687	2.94e-05
8143387	MKRN1	NM_013446	3e-05
8047443	STRADB	NM_018571	3e-05
7945132	FLI1	NM_002017	3.17e-05
7944179	CD3E	NM_000733	3.47e-05
8169263	VSIG1	NM_182607	3.49e-05
7963289	BIN2	NM_016293	3.61e-05
8034514	C19orf43	NM_024038	3.61e-05
8173135	ALAS2	NM_000032	3.82e-05
8033605	MYO1F	NM_012335	4.03e-05
7946275	GVIN1	NR_003945	4.08e-05
7910241	GUK1	NM_000858	4.28e-05
8020806	RNF125	NM_017831	4.53e-05
7988033	EPB42	NM_000119	4.6e-05
8007931	ITGB3	NM_000212	4.8e-05
7921900	SH2D1B	NM_053282	4.92e-05
7965606	HAL	NM_002108	5.03e-05
8046695	ITGA4	NM_000885	5.5e-05
8180346	GPX1	NM_000581	5.97e-05
8024111	CNN2	NM_004368	6.19e-05
8124430	HIST1H1D	NM_005320	6.29e-05
7920238	S100A12	NM_005621	6.29e-05
7961151	KLRK1	NM_007360	6.37e-05
8036755	CLC	NM_001828	6.48e-05
8095870	CCNG2	NM_004354	6.5e-05
7899253	ZDHHC18	NM_032283	6.61e-05
7997453	PLCG2	NM_002661	6.7e-05
7896292	NA	NA	7.3e-05
7922219	SELL	NM_000655	7.5e-05
7896687	NA	NA	8.42e-05
7921677	CD244	NM_016382	9.14e-05
7909283	NA	NA	9.28e-05
8156706	TMOD1	NM_003275	9.9e-05
8109507	ITK	NM_005546	0.000106683
8124280	FAM65B	NM_014722	0.00010677
7894596	NA	NA	0.000108121
8180348	XCL1	NM_002995	0.000108473
8151101	MYBL1	NM_001080416	0.000109581
7921625	SLAMF6	NM_052931	0.000111113
7941444	CTSW	NM_001335	0.000112347
8086344	CX3CR1	NM_001337	0.000124665
8057990	ANKRD44	NM_153697	0.000128156
7940287	MS4A1	NM_152866	0.000129774
7899534	EPB41	NM_203342	0.000130164
8145281	SLC25A37	NM_016612	0.000133233
8091530	P2RY12	NM_022788	0.000133555
8137232	GIMAP8	NM_175571	0.000136969
8101762	SNCA	NM_000345	0.000137912
8004024	GP1BA	NM_000173	0.000140008
7904287	CD2	NM_001767	0.000142716
7936673	RGS10	NM_001005339	0.000147567
7952601	ETS1	NM_001143820	0.000147843
7906128	SLC25A44	NM_014655	0.000149175
7902495	NEXN	NM_144573	0.000155319
7913883	PAFAH2	NM_000437	0.000158483
8093294	CCR2	NM_001123041	0.000159359
7937735	LSP1	NM_002339	0.000164564
8012416	C17orf44	NR_026951	0.000167446
8117589	HIST1H3H	NM_003536	0.00017041
7953949	KLRD1	NM_002262	0.000172502
8036913	BLVRB	NM_000713	0.000175004
8035494	FKBP8	NM_012181	0.000175355
8138091	DAGLB	NM_139179	0.00017955
8129482	SAMD3	NM_001017373	0.000190772
8134257	GNG11	NM_004126	0.00019404
7959173	RNF10	NM_014868	0.000198401
8175393	ARHGEF6	NM_004840	0.000202661
8078227	KAT2B	NM_003884	0.000204909
8136662	MGAM	NM_004668	0.00020618
7902594	PRKACB	NM_182948	0.000206349
8165011	FCN1	NM_002003	0.00020693
8107307	CAMK4	NM_001744	0.000208867
7953901	CLEC12A	NM_138337	0.000210247
7917232	GNG5	NM_005274	0.00022381
7923503	ADIPOR1	NM_015999	0.000235151
8170479	VMA21	NM_001017980	0.000236167
8032410	MOBKL2A	NM_130807	0.000240469
7965156	LIN7A	NM_004664	0.000251913
8088247	ARHGEF3	NM_001128615	0.000254862
7938485	MICAL2	NM_014632	0.000265882
8088106	TKT	NM_001135055	0.00026638
8102998	GYPA	NM_002099	0.000278399
8002194	DPEP2	NM_022355	0.000282461
8168531	GPR174	NM_032553	0.000287147
7920382	CRTC2	NM_181715	0.000298013
8014063	EVI2B	NM_006495	0.000306438
8164607	FNBP1	NM_015033	0.000312507
8059854	ARL4C	NM_005737	0.000314346
7960518	TNFRSF1A	NM_001065	0.000317067
7966127	SELPLG	NM_003006	0.000330334
7961059	KLRB1	NM_002258	0.00033303
7906475	FCRL6	NM_001004310	0.0003399
7930398	MXI1	NM_005962	0.00034826
8145291	SLC25A37	AF495725	0.000349034
8095574	DCK	NM_000788	0.000350535
8031293	KIR2DL3	NM_014511	0.000360046
7914021	SLC9A1	NM_003047	0.000371798
8000791	YPEL3	NM_031477	0.000385505
7954492	FGFR1OP2	NM_015633	0.000388507
8138789	JAZF1	NM_175061	0.000403762
8093500	TACC3	NM_006342	0.000406226
8105331	GZMK	NM_002104	0.000430884
8140227	NCF1	NM_000265	0.000443115
8133518	NCF1	NM_000265	0.000448263
8015991	SLC4A1	NM_000342	0.000450934
8139107	TARP	AK056843	0.000453636
8133314	NCF1	NM_000265	0.000460246
8100798	SULT1B1	NM_014465	0.000467799
8125734	DAXX	NM_001141969	0.000475841
8038029	CARD8	NM_014959	0.000486315
7892564	NA	NA	0.000494221
7926127	CELF2	NM_001025077	0.000502532
8115327	SPARC	NM_003118	0.000510842
7985099	PSTPIP1	NM_003978	0.000510868
7896715	NA	NA	0.000523487
8132819	IKZF1	NM_006060	0.000529011
8100210	TXK	NM_003328	0.000537222
8018305	HN1	NM_016185	0.000546647
8106743	VCAN	NM_004385	0.000553551
7920244	S100A8	NM_002964	0.000556147
8149116	DEFA3	NM_005217	0.000556233
8149126	DEFA3	NM_005217	0.000556233
8149137	DEFA3	NM_005217	0.000556233
8164596	C9orf78	NM_016520	0.000560854
8164644	FAM78A	NM_033387	0.000568045
7931930	PRKCQ	NM_006257	0.000572246
7920971	C1orf85	NM_144580	0.000590127
8102993	GYPB	NM_002100	0.000593133
7996313	CMTM2	NM_144673	0.000594871
8078442	CCR4	NM_005508	0.00060335
8047062	C2orf88	NM_001042519	0.000625903
8137244	GIMAP4	NM_018326	0.000656646
8154357	NA	ENST00000441944	0.000659313
8140967	SAMD9	NM_017654	0.000669616
8102532	PDE5A	NM_001083	0.000682609
7921667	CD48	NM_001778	0.000682906
8180179	DAXX	NM_001141969	0.000686245
8091523	P2RY13	NM_176894	0.000693319
8045563	ARHGAP15	NM_018460	0.000711423
7996290	CMTM1	NM_052999	0.000713015
7922040	CD247	NM_198053	0.000718527
8039096	NLRP12	NM_144687	0.000719256
7953385	GAPDH	NM_002046	0.000720827
8174692	SEPT6	NM_145799	0.000726067
8115234	ANXA6	NM_001155	0.000733781
7895510	NA	NA	0.00074267
8061416	CST7	NM_003650	0.000770454
7909214	RASSF5	NM_182663	0.000770518
7949104	RASGRP2	NM_001098671	0.000777653
8178991	DAXX	NM_001141969	0.000779234
8075009	C22orf13	NM_031444	0.000780808
8071301	C22orf25	NM_152906	0.000782098
7957260	GLIPR1	NM_006851	0.000783251
8170998	F8A1	NM_012151	0.000800683
7953878	CLEC2D	NM_001004419	0.000809713
8122554	RAB32	NM_006834	0.000811378
8011884	NLRP1	NM_033004	0.000814513
8042416	ARHGAP25	NM_014882	0.000814841
8103695	MFAP3L	NM_021647	0.000819393
7979671	MAX	NM_145113	0.000821504
7953892	KLRF1	NM_016523	0.000826396
7906377	MNDA	NM_002432	0.000832375
8149109	DEFA4	NM_001925	0.000837481
8043363	NCRNA00152	NR_024204	0.000838977
8130768	RNASET2	NM_003730	0.000849774
8001030	PYCARD	NM_013258	0.000858951
8137240	GIMAP7	NM_153236	0.000863706
8110318	PRELID1	NM_013237	0.00086731
7903162	TMEM56	NM_152487	0.000869512
7923967	YOD1	NM_018566	0.000874523
7908409	RGS2	NM_002923	0.000877238
8013319	GRAP	NM_006613	0.000892074
8009353	PITPNC1	NM_181671	0.000894602
8014066	EVI2A	NM_001003927	0.00089952
8169709	GLRX5	NM_016417	0.000900613
8096617	BANK1	NM_017935	0.000901743
