# Supplementary material for: Characterizing the Molecular Spatial and Temporal Field of Injury in Early-Stage Smoker Non–Small Cell Lung Cancer Patients after Definitive Surgery by Expression Profiling
Source: Oxford University Press journal article supplement (doi:10.1158/1940-6207.capr-12-0290), 2012-10-19
Supplement: 19406207capr120290-sup-tab3.xlsx [file 19406207capr120290-sup-tab3.xlsx]

## Sheet: Sheet1
Supplementary Table 3
UNIQID	Symbol	Accession	p-value	Gene cluster
7895062	NA	NA	2.22045e-16	8
7895632	NA	NA	1.06581e-14	8
7895574	NA	NA	5.19584e-14	8
7894546	NA	NA	8.96949e-13	2
7895907	NA	NA	8.16469e-12	8
7993821	NCRNA00169	NR_026675	9.08607e-12	4
7895585	NA	NA	2.43432e-11	6
7896616	NA	NA	2.82854e-11	8
7893244	NA	NA	1.87481e-10	6
7973660	GMPR2	NM_016576	2.1913e-10	7
7896468	NA	NA	2.60914e-10	7
7894188	NA	NA	2.66752e-10	7
7894903	NA	NA	2.6937e-10	7
7893249	NA	NA	8.49471e-10	2
7966213	MMAB	NM_052845	1.37932e-09	5
8047059	HNRNPC	NM_031314	4.29608e-09	8
8019930	MYL12B	NM_033546	4.66406e-09	1
7977340	BTBD6	NM_033271	7.45995e-09	2
7894685	NA	NA	9.20589e-09	8
8062174	ERGIC3	NM_198398	1.46408e-08	5
8065868	EIF6	NM_002212	2.86811e-08	2
8026698	C19orf62	NM_001033549	3.15144e-08	2
8176191	HMGN1	NM_004965	3.8978e-08	8
8136177	KLHDC10	AF277177	3.96287e-08	5
7963713	ATP5G2	NM_005176	4.26408e-08	2
8131101	NUDT1	NM_198949	5.23719e-08	2
7896324	NA	NA	5.34829e-08	7
7893091	NA	NA	5.41531e-08	4
8087839	POC1A	NM_015426	5.49936e-08	2
8125204	RDBP	NM_002904	6.79276e-08	5
8178686	RDBP	NM_002904	6.79276e-08	5
8179913	RDBP	NM_002904	6.79276e-08	5
7894711	NA	NA	6.8515e-08	8
7892580	NA	NA	7.47482e-08	4
7894798	NA	NA	7.76245e-08	7
7999112	PAM16	NM_016069	8.02644e-08	2
8142343	NA	ENST00000459130	8.05553e-08	3
7892757	NA	NA	9.70933e-08	7
7981947	SNORD109A	NR_001295	1.20526e-07	4
7982098	SNORD109A	NR_001295	1.20526e-07	4
7967072	COQ5	NM_032314	1.29527e-07	7
8134644	ZNF498	NM_145115	1.54132e-07	4
7893786	NA	NA	1.74068e-07	3
7893122	NA	NA	1.85388e-07	8
8122242	PEX7	NM_000288	2.00295e-07	7
8103904	NA	ENST00000430005	2.34007e-07	2
7894664	NA	NA	2.63424e-07	3
7895145	NA	NA	2.81175e-07	8
7895590	NA	NA	3.12622e-07	1
8169247	NA	ENST00000372379	4.88652e-07	5
7937287	PSMD13	NM_002817	5.19166e-07	7
7916969	ZRANB2	NM_005455	5.57089e-07	8
7998485	C16orf91	BC092497	5.9813e-07	2
7927550	NA	ENST00000317346	6.27591e-07	3
7901073	UROD	NM_000374	6.45109e-07	7
8136159	NA	ENST00000362646	7.66481e-07	8
7892652	NA	NA	8.18621e-07	7
7945573	POLR2L	NM_021128	8.57155e-07	2
7911568	SSU72	NM_014188	1.01539e-06	2
7898663	PINK1	NM_032409	1.03785e-06	5
7895643	NA	NA	1.09776e-06	8
7902808	LOC339524	NR_026989	1.09796e-06	6
7896089	NA	NA	1.11288e-06	8
8003401	APRT	NM_000485	1.17662e-06	2
7894561	NA	NA	1.26442e-06	7
7929243	NHP2	NM_017838	1.34429e-06	2
7894986	NA	NA	1.37526e-06	4
7918050	RPSA	NM_002295	1.46318e-06	2
8107702	C5orf48	BC130495	1.51977e-06	4
7955777	C12orf10	NM_021640	1.71436e-06	5
7893958	NA	NA	1.73216e-06	3
7947969	FNBP4	NM_015308	1.74871e-06	3
7989883	NA	ENST00000459325	1.78083e-06	3
8007141	EIF1	NM_005801	1.84565e-06	7
8164293	AK1	NM_000476	1.86574e-06	5
8045341	NA	AF251048	2.22618e-06	4
7894316	NA	NA	2.3572e-06	5
7893966	NA	NA	2.35855e-06	8
8042801	DGUOK	NM_080916	2.59389e-06	7
8026687	OCEL1	NM_024578	2.59991e-06	5
7979959	NA	ENST00000416212	2.6002e-06	4
8002711	NA	ENST00000443762	2.79675e-06	2
8136179	KLHDC10	AF277175	2.91568e-06	5
8041568	NA	ENST00000384258	3.07832e-06	3
8075585	C22orf28	NM_014306	3.14211e-06	7
7923965	NA	ENST00000459582	3.20202e-06	4
8149273	NA	ENST00000458812	3.28827e-06	4
7951112	MTMR2	NR_023356	3.42038e-06	5
7951030	SNORD6	NR_003036	3.48291e-06	3
8164006	NA	ENST00000410419	3.51272e-06	3
7894071	NA	NA	3.59873e-06	4
8009176	TACO1	NM_016360	3.62768e-06	5
7977273	ADSSL1	NM_152328	3.76778e-06	5
8142464	NA	NA	3.8007e-06	3
8136591	ADCK2	NM_052853	3.95099e-06	2
7892619	NA	NA	4.17661e-06	3
7896500	NA	NA	4.33158e-06	3
7982507	TMEM85	NM_016454	4.5443e-06	7
7998978	ZNF597	NM_152457	4.75315e-06	7
7896241	NA	NA	4.76286e-06	5
7968272	NA	ENST00000429873	4.87011e-06	2
7892552	NA	NA	4.93139e-06	4
8140828	SRI	NM_003130	5.14555e-06	5
8130003	SF3B5	NM_031287	5.16809e-06	7
7907349	NA	ENST00000411006	5.53329e-06	3
7895928	NA	NA	5.90427e-06	2
7893191	NA	NA	6.28244e-06	8
7924956	ABCB10	NM_012089	6.53893e-06	5
7986433	ASB7	NM_198243	6.57132e-06	5
7949518	FIBP	NM_198897	6.60603e-06	5
7941936	GSTP1	NM_000852	7.08188e-06	2
7990090	NA	ENST00000401798	7.21904e-06	1
7895016	NA	NA	7.43611e-06	7
7893642	NA	NA	7.6448e-06	4
8049784	PPP1R7	NM_002712	8.01222e-06	5
8111327	NA	ENST00000362895	8.4062e-06	4
7924817	PRO2012	BC019830	8.4522e-06	3
7894540	NA	NA	8.81135e-06	8
8110415	SUDS3	NM_022491	8.82462e-06	8
7918437	HBXIP	NM_006402	8.83459e-06	7
7915204	PPIEL	AK093659	8.96608e-06	4
7932510	NA	ENST00000364520	9.42255e-06	3
7896328	NA	NA	9.4552e-06	3
8078905	RPSA	NM_002295	9.85085e-06	2
7893218	NA	NA	1.00217e-05	8
7914354	PEF1	NM_012392	1.03132e-05	2
7895118	NA	NA	1.04785e-05	3
8087236	DALRD3	NM_001009996	1.0484e-05	5
7897441	H6PD	NM_004285	1.10041e-05	8
7897044	PRKCZ	NM_002744	1.11438e-05	5
7894016	NA	NA	1.11504e-05	3
7903183	NA	ENST00000415278	1.14671e-05	6
8157246	KIAA1958	BC105048	1.16866e-05	5
7894535	NA	NA	1.18861e-05	8
8013177	NA	ENST00000364508	1.22895e-05	3
7897460	SLC25A33	NM_032315	1.2353e-05	7
8144239	FBXO25	NM_183421	1.25808e-05	7
7962895	FKBP11	NM_016594	1.26275e-05	2
8007272	COASY	NM_025233	1.28892e-05	2
7951896	PCSK7	NM_004716	1.29629e-05	4
8055946	NA	ENST00000430257	1.31315e-05	4
7949075	TRMT112	NM_016404	1.34429e-05	7
7892707	NA	NA	1.37026e-05	3
8134415	ACN9	NM_020186	1.37564e-05	2
7967060	SRSF9	NM_003769	1.39693e-05	7
8068363	C21orf82	NR_027267	1.40103e-05	4
7892576	NA	NA	1.42844e-05	5
7926205	NA	ENST00000458754	1.45314e-05	3
7959927	SFRS8	NM_004592	1.45358e-05	8
8005655	NA	NA	1.4736e-05	4
7896086	NA	NA	1.49877e-05	3
8003850	CYB5D2	NM_144611	1.53823e-05	5
7911578	CDK11A	NM_024011	1.56684e-05	8
7893287	NA	NA	1.59659e-05	3
8003769	NA	ENST00000459563	1.59947e-05	4
7914791	SFPQ	NM_005066	1.63459e-05	8
7999317	TMEM186	NM_015421	1.65996e-05	7
7947989	NA	ENST00000363220	1.67704e-05	3
8169928	FAM45B	NR_027141	1.69074e-05	2
7893632	NA	NA	1.69854e-05	8
8067942	NA	hsa-mir-99a	1.72248e-05	4
7895008	NA	NA	1.8828e-05	4
7894351	NA	NA	1.92055e-05	3
7893970	NA	NA	1.93376e-05	4
7964828	NA	GENSCAN00000052941	1.96015e-05	2
8074577	PI4KAP2	NR_003700	1.97375e-05	8
7895123	NA	NA	1.97419e-05	6
7942779	NA	ENST00000384089	2.00856e-05	4
8180294	NA	NM_033534	2.02209e-05	8
7893910	NA	NA	2.07132e-05	2
8093462	MAEA	NM_001017405	2.07558e-05	2
8170992	SNORA56	NR_002984	2.09661e-05	4
7893215	NA	NA	2.10791e-05	3
8006845	RPL19	NM_000981	2.13478e-05	4
8012247	SAT2	NM_133491	2.16791e-05	5
8077777	NA	ENST00000459242	2.18323e-05	4
8118667	NA	ENST00000416347	2.1932e-05	1
8103892	NA	ENST00000364563	2.21855e-05	3
7959164	DYNLL1	NM_001037495	2.22814e-05	5
7943738	NA	hsa-mir-34c	2.23865e-05	5
7967067	DYNLL1	NM_001037495	2.30161e-05	5
7895668	NA	NA	2.34783e-05	4
8034454	DHPS	NM_001930	2.40864e-05	5
8014264	PEX12	NM_000286	2.40937e-05	7
7960757	C1RL	NM_016546	2.4989e-05	8
7905474	OAZ3	NM_016178	2.59082e-05	6
7894922	NA	NA	2.72549e-05	4
7894159	NA	NA	2.89249e-05	3
7892791	NA	NA	2.91233e-05	8
8153903	RPL8	NM_000973	3.09236e-05	2
7985983	NGRN	NM_016645	3.10646e-05	5
7998117	41166	NM_207366	3.3682e-05	8
8076374	NHP2L1	NM_005008	3.40659e-05	7
7893258	NA	NA	3.44624e-05	7
8123621	SERPINB6	NM_004568	3.63862e-05	5
8180290	CDK11B	NM_033488	3.76839e-05	8
8180291	CDK11B	NM_033489	3.76839e-05	8
7957242	ATXN7L3B	NM_001136262	3.80318e-05	5
7896627	NA	NA	3.89762e-05	6
8009784	MRPS7	NM_015971	3.9099e-05	7
8173208	SPIN4	NM_001012968	3.9288e-05	2
8083142	NA	NA	3.93952e-05	3
8179298	CSNK2B	NM_001320	4.05421e-05	7
8154836	ANXA2P2	NR_003573	4.07157e-05	5
7965467	NA	ENST00000358888	4.2623e-05	8
7982129	NA	ENST00000358888	4.2623e-05	8
7905986	FDPS	NM_002004	4.26959e-05	7
7894775	NA	NA	4.33711e-05	3
8020804	NA	ENST00000410388	4.4047e-05	3
7896330	NA	NA	4.54864e-05	3
7951091	NA	ENST00000364279	4.59172e-05	4
7893452	NA	NA	4.75334e-05	3
7894641	NA	NA	4.869e-05	4
8132036	WIPF3	NM_001080529	4.89548e-05	6
7906652	NIT1	NM_005600	5.10843e-05	5
8152031	FBXO43	NM_001077528	5.36834e-05	2
8022502	NA	ENST00000410588	5.37997e-05	4
7904569	NA	AK299612	5.3847e-05	3
7896393	NA	NA	5.39642e-05	3
8179391	STK19	NR_026717	5.42378e-05	2
7948775	C11orf48	NM_024099	5.4441e-05	5
8118218	CSNK2B	NM_001320	5.48512e-05	7
7893292	NA	NA	5.50039e-05	4
8127087	GSTA3	NM_000847	5.65235e-05	5
8082229	UMPS	NM_000373	5.72998e-05	7
8062971	DBNDD2	NM_001048223	5.7312e-05	2
7898736	HSPC157	NR_023918	5.73788e-05	5
7962842	ADCY6	NM_015270	5.74999e-05	4
7893297	NA	NA	5.77344e-05	7
7970467	N6AMT2	NM_174928	5.79709e-05	7
7927106	NA	NA	5.88306e-05	3
8174026	YWHAQP8	DQ145510	5.90381e-05	6
8161644	NA	ENST00000410533	5.97238e-05	3
8002618	ZNF821	NM_017530	6.03276e-05	8
8175432	SNORD61	NR_002735	6.04068e-05	8
8173148	FAM104B	BC017571	6.16902e-05	5
8062016	DYNLRB1	NM_014183	6.17414e-05	5
7895996	NA	NA	6.19666e-05	7
8180194	NA	NM_001787	6.19697e-05	8
8180288	CDK11B	NM_033486	6.19697e-05	8
8180293	CDK11B	NM_033493	6.19697e-05	8
7939137	EIF3M	NM_006360	6.23223e-05	7
8037331	XRCC1	NM_006297	6.27808e-05	5
8173206	NA	ENST00000450308	6.34692e-05	8
8071314	DGCR8	NM_022720	6.47851e-05	8
7895661	NA	NA	6.54038e-05	8
7893664	NA	NA	6.55498e-05	8
7928746	NA	ENST00000384545	6.67902e-05	6
7932420	PTPLA	NM_014241	6.76049e-05	8
8150126	PPP2CB	NM_001009552	6.87371e-05	5
7894702	NA	NA	7.08105e-05	3
7896150	NA	NA	7.11373e-05	3
8180292	CDK11B	NM_033492	7.13726e-05	8
8150844	NA	ENST00000413112	7.2224e-05	2
8020827	MEP1B	NM_005925	7.22632e-05	4
7895674	NA	NA	7.47546e-05	1
8013588	POLDIP2	NM_015584	7.57208e-05	2
8120011	SPATS1	NM_145026	7.57762e-05	5
8008096	SNX11	NM_152244	7.74793e-05	8
7896547	NA	NA	7.81791e-05	7
7894295	NA	NA	7.84072e-05	8
8014349	CCL14-CCL15	NR_027921	7.84375e-05	5
7942277	NA	ENST00000454336	7.89805e-05	6
8089873	NA	NA	7.982e-05	4
7947015	TSG101	NM_006292	8.15935e-05	7
7955063	TMEM106C	NM_001143842	8.38311e-05	2
8159111	WDR5	NM_017588	8.44749e-05	5
8172358	UXT	NM_153477	8.53169e-05	7
7989335	ANXA2	NM_001002858	8.54027e-05	5
7893878	NA	NA	8.67871e-05	3
8178050	CSNK2B	NM_001320	8.75356e-05	7
8063668	GNAS	NM_000516	8.81089e-05	7
7980535	DYNLL1	NM_001037494	8.81552e-05	5
8147479	NA	ENST00000384486	8.83506e-05	4
7975661	COQ6	NM_182476	8.93e-05	7
8086317	GORASP1	NM_031899	8.97385e-05	6
8078962	EIF1B	NM_005875	9.04274e-05	7
7977906	ACIN1	NM_014977	9.07323e-05	8
8125134	HSPA1L	NM_005527	9.13921e-05	5
8178650	HSPA1L	NM_005527	9.13921e-05	5
8179848	HSPA1L	NM_005527	9.13921e-05	5
8034055	KRI1	NM_023008	9.32257e-05	8
7896189	NA	NA	9.36134e-05	3
7896456	NA	NA	9.47366e-05	5
8180289	CDK11B	NM_033487	9.50753e-05	8
8172548	GPKOW	NM_015698	9.53001e-05	5
8081501	NA	ENST00000365509	9.55585e-05	4
7895676	NA	NA	9.61661e-05	5
7894306	NA	NA	9.68316e-05	7
8078248	HMGB1	NM_002128	9.71345e-05	8
8085660	DPH3	NM_206831	9.73004e-05	7
8134581	ARPC1A	NM_006409	9.81273e-05	7
8180295	NA	NM_033536	9.83769e-05	8
7997852	TRAPPC2L	NM_016209	0.000101677	5
8004133	RPAIN	NR_027680	0.000102837	5
8115443	NA	NA	0.000104079	8
8157580	NA	ENST00000410541	0.000106775	4
8117622	OR2B6	NM_012367	0.000106778	4
7974531	RPL13AP3	NR_004844	0.000108894	6
8142098	ATXN7L1	NM_020725	0.000109024	5
7893277	NA	NA	0.000110282	4
7894666	NA	NA	0.000111484	8
7896542	NA	NA	0.000115891	7
8150186	RNF122	NM_024787	0.000116215	8
7965935	GNN	NR_027249	0.000117406	5
8161509	FRG1	NM_004477	0.000118038	8
7989243	NA	ENST00000458913	0.000119624	3
7901856	NA	AY669118	0.000120744	7
7896031	NA	NA	0.000122456	4
8180296	NA	NM_033537	0.000123054	8
7915870	ATPAF1	NM_022745	0.000123079	7
8123728	LYRM4	NM_020408	0.000125379	5
7906041	DAP3	NM_033657	0.000127442	7
7917779	GCLM	NM_002061	0.000129387	5
7932721	LOC387646	NR_003525	0.000129825	6
8087985	GLT8D1	NM_001010983	0.000129895	5
8162529	NA	ENST00000459065	0.000130037	4
7932733	MKX	NM_173576	0.000132839	5
8129062	HS3ST5	NM_153612	0.000133033	4
8180199	NA	NM_033490	0.000133178	8
8117081	KDM1B	NM_153042	0.000133342	5
8175844	IDH3G	NM_174869	0.000133765	2
8034901	OR7A17	NM_030901	0.000134237	4
7904562	NBPF14	AK294944	0.000135283	3
7907486	ZBTB37	NM_032522	0.000135622	8
8065752	NA	NA	0.000136214	3
8050365	NA	NA	0.000137763	6
8053187	PCGF1	NM_032673	0.000139635	2
8020491	NA	NA	0.000140497	4
7930311	GSTO2	NM_183239	0.000140961	5
7998222	MRPL28	NM_006428	0.000142885	2
7902787	NA	ENST00000447415	0.000143344	1
7895073	NA	NA	0.00014447	4
7998129	POLR3K	NM_016310	0.000145951	7
7893581	NA	NA	0.000145964	3
8100389	NA	ENST00000459598	0.000149525	4
7904486	NBPF9	AK294414	0.000149836	3
7994683	TMEM219	NM_001083613	0.00015124	2
7895042	NA	NA	0.000152209	5
7895274	NA	NA	0.000153331	8
7893684	NA	NA	0.000154307	7
8005857	TMEM199	NM_152464	0.000155137	2
7912882	NA	NA	0.000156389	4
7916403	SSBP3	NM_145716	0.000157001	5
7904506	NBPF9	AK095030	0.00016143	3
8083569	TIPARP	NM_015508	0.00016199	7
7893768	NA	NA	0.000162861	3
8156058	NA	ENST00000338392	0.000163637	6
7939477	ALKBH3	NM_139178	0.000166815	7
7923582	NA	ENST00000449917	0.000167479	1
7896325	NA	NA	0.000170176	8
8061211	DTD1	NM_080820	0.000170844	7
7945349	BET1L	NM_016526	0.000171259	2
7895423	NA	NA	0.000172496	3
8032974	SAFB2	NM_014649	0.000173054	8
7894496	NA	NA	0.000175369	7
7909839	NA	ENST00000459443	0.000176507	4
8139879	NA	ENST00000438081	0.000177837	1
7895231	NA	NA	0.000179015	7
8137566	RNF32	NM_030936	0.000180043	5
7892761	NA	NA	0.000180419	4
7893812	NA	NA	0.000181377	3
8126446	C6orf226	NM_001008739	0.00018173	5
8107470	PTMA	NM_002823	0.000181797	8
7909146	FAM72D	AB096683	0.000182186	2
7895090	NA	NA	0.000184161	7
7894848	NA	NA	0.000185638	3
8011222	SMG6	NM_017575	0.000185809	8
8025004	CAPS	NM_004058	0.000186953	5
8171222	HDHD1	NM_001135565	0.000188043	6
8094257	NA	ENST00000459186	0.000188365	4
7894763	NA	NA	0.000188417	3
8038792	ETFB	NM_001985	0.000191728	2
7936637	SNORA19	NR_002917	0.000192087	3
7893721	NA	NA	0.000193804	1
8042843	WDR54	NM_032118	0.00019674	5
8142230	NA	ENST00000458938	0.000198719	4
7893488	NA	NA	0.000200599	3
8109057	SPINK9	NM_001040433	0.000203168	3
7898209	NA	ENST00000420030	0.000206711	2
7970831	UBL3	NM_007106	0.000208455	5
7921970	ALDH9A1	NM_000696	0.000210014	7
8174195	NA	ENST00000384576	0.000210157	3
8113577	TRIM36	NM_018700	0.00021036	5
7895410	NA	NA	0.000210912	3
7894240	NA	NA	0.000211675	4
7894741	NA	NA	0.000212155	6
7896076	NA	NA	0.000212968	8
8009227	PSMC5	NM_002805	0.000213415	7
8116020	LMAN2	NM_006816	0.000213949	2
7910694	EDARADD	NM_080738	0.000214403	8
7913768	IL22RA1	NM_021258	0.000215238	5
8014035	NA	ENST00000411089	0.000218105	4
8026298	NA	ENST00000411089	0.000218105	4
7893816	NA	NA	0.000218893	7
7910229	ARF1	NM_001024226	0.000220204	2
7893901	NA	NA	0.000220639	6
8098707	HSP90AA4P	AY956760	0.0002253	6
7933261	NA	ENST00000317346	0.000225375	3
7933572	NA	ENST00000317346	0.000225375	3
8065795	HMGB3L1	NR_002165	0.000227894	4
8075828	IFT27	NM_006860	0.00022801	5
8039928	FAM72D	AB096683	0.000229029	2
8167163	NA	ENST00000357412	0.000230488	5
8157632	MORN5	NM_198469	0.000231962	5
7948088	SLC25A33	NM_032315	0.000235061	7
7932542	C10orf67	NM_153714	0.00023997	5
7892917	NA	NA	0.000240653	4
7922137	NME7	NM_013330	0.000249288	5
7893815	NA	NA	0.000249458	1
8113660	NA	ENST00000327878	0.000250807	1
7895934	NA	NA	0.000252222	2
7896371	NA	NA	0.000252486	1
8163614	NA	ENST00000459142	0.000253521	4
7976152	NA	NA	0.000254504	3
7896010	NA	NA	0.000255077	3
8126770	CYP39A1	NM_016593	0.000258971	5
7935810	NDUFB8	NM_005004	0.000260986	5
8048370	BCS1L	NM_004328	0.000261219	5
7895283	NA	NA	0.000261319	1
8173174	USP51	NM_201286	0.000261558	5
7959882	RAN	NM_006325	0.000261653	7
8074464	UFD1L	NM_005659	0.000262033	7
7892587	NA	NA	0.000263642	3
7961298	TAS2R42	NM_181429	0.000263917	4
8104727	TOMM7	NM_019059	0.000264002	6
7972723	ARGLU1	NM_018011	0.000266824	3
7895921	NA	NA	0.000269951	3
7989725	PDCD7	NM_005707	0.000270565	8
8175811	FAM58A	NM_152274	0.0002713	6
7895081	NA	NA	0.000271878	1
7953620	NA	NA	0.00027205	4
7975154	NCRNA00238	NR_024338	0.000273186	4
8149966	SCARA5	NM_173833	0.000273809	4
8105229	PELO	NM_015946	0.000275741	2
7934733	ANXA11	NM_145869	0.000279343	2
7977784	NA	ENST00000391000	0.000280865	3
7930450	NA	ENST00000458966	0.000281494	3
7895695	NA	NA	0.000283995	3
7892794	NA	NA	0.000286593	3
8023843	FBXO15	NM_152676	0.00028798	5
7964234	ATP5B	NM_001686	0.000288188	7
7913380	NBPF3	NM_032264	0.000288521	3
8123800	NA	ENST00000455087	0.000290885	2
8052845	TIA1	NM_022173	0.000291737	8
7912646	CASP9	NM_001229	0.000292813	6
7967473	EIF2B1	NM_001414	0.000292912	7
7902435	NA	ENST00000420977	0.000293469	6
7896011	NA	NA	0.00029425	3
7932552	NA	ENST00000451889	0.000299332	3
8165642	TMEM203	NM_053045	0.000300022	7
8118395	STK19	NR_026717	0.000300649	2
8178164	STK19	NR_026717	0.000300649	2
8169645	UBE2A	NM_003336	0.000302182	7
7982292	NA	ENST00000384119	0.000302464	4
8119882	RSPH9	NM_152732	0.000304884	5
8121578	NT5DC1	NM_152729	0.00031156	5
7978174	CHMP4A	NM_014169	0.000312299	2
7971369	KCTD4	NM_198404	0.00031237	4
7904874	NBPF11	NM_183372	0.000313769	3
7894280	NA	NA	0.000318878	3
8065832	TRPC4AP	NM_015638	0.000319504	8
8116168	NHP2	NM_017838	0.000320332	2
8101839	EIF4E	NM_001968	0.000321032	6
8131705	RPL23P8	NR_026673	0.000321334	6
8068478	CHAF1B	NM_005441	0.000322775	2
7895375	NA	NA	0.000323017	4
8154885	NUDT2	NM_001161	0.000326322	2
7896466	NA	NA	0.000326799	2
7901416	NA	ENST00000410615	0.000326943	4
8068651	PCP4	NM_006198	0.000328397	8
7895094	NA	NA	0.000329249	3
7907970	NA	ENST00000423841	0.000334988	1
7935011	CPEB3	NM_014912	0.000336352	3
7893346	NA	NA	0.000339851	5
7928354	FAM149B1	NM_173348	0.000341073	7
8036557	NA	NA	0.00034262	2
8002020	TPPP3	NM_016140	0.000346951	5
7960427	AKAP3	NM_006422	0.000347394	5
8014871	PGAP3	NM_033419	0.000348439	8
8144717	NA	ENST00000384269	0.000351323	3
8140857	NA	ENST00000459044	0.000352682	3
7894187	NA	NA	0.00035392	3
8068494	NA	AF050199	0.000355702	7
8126058	PPIL1	NM_016059	0.000355976	2
7893777	NA	NA	0.000356474	7
7977820	PRMT5	NM_001039619	0.000358868	5
7906185	APOA1BP	NM_144772	0.000359693	2
8069744	RWDD2B	NM_016940	0.00036242	7
8111210	NA	CR614585	0.000363503	2
7975772	FAM164C	NM_024643	0.000363843	5
8074286	MICAL3	NM_015241	0.000364654	4
7894542	NA	NA	0.000366148	2
8106720	NA	ENST00000411030	0.000367882	3
7892848	NA	NA	0.000368581	3
8039740	ZNF329	NM_024620	0.000369459	5
7998002	ZNF276	NM_152287	0.000371434	4
7933209	ZNF22	NM_006963	0.000372174	6
7894238	NA	NA	0.000372937	2
7893769	NA	NA	0.000375419	6
7959322	PSMD9	NM_002813	0.000375799	7
7894328	NA	NA	0.000376363	3
7963696	NA	AK054879	0.00037666	4
8092640	RFC4	NM_002916	0.000376813	7
8090295	SLC41A3	NM_017836	0.000377383	5
7892932	NA	NA	0.000378238	3
8087337	LAMB2	NM_002292	0.000378644	8
7916743	NA	ENST00000384461	0.000378784	4
8154523	RRAGA	NM_006570	0.000379238	7
7911333	RPL23AP7	NR_024528	0.000385885	1
8069470	RPL23AP7	NR_024528	0.000385885	1
7893429	NA	NA	0.000388485	4
7947138	FANCF	NM_022725	0.000390052	5
8093256	NA	ENST00000452862	0.000390312	1
7904452	FAM72D	AB096683	0.000391511	2
8074869	RTDR1	NM_014433	0.00039278	5
8063620	VAPB	NM_004738	0.000393993	7
7896742	SEPT14	NM_207366	0.000394191	8
7911347	SEPT14	NM_207366	0.000394191	8
7945342	SEPT14	NM_207366	0.000394191	8
8031990	SEPT14	NM_207366	0.000394191	8
8085054	SEPT14	NM_207366	0.000394191	8
8110670	SEPT14	NM_207366	0.000394191	8
8137666	SEPT14	NM_207366	0.000394191	8
8148964	SEPT14	NM_207366	0.000394191	8
7970704	MTIF3	NM_152912	0.000396471	7
7907466	DARS2	NM_018122	0.000401245	7
8123712	NA	NA	0.000401392	4
7928401	CHCHD1	NM_203298	0.000401396	7
8075423	DUSP18	NM_152511	0.000402808	5
7915731	NA	ENST00000459207	0.000408809	4
8003733	SGSM2	NM_014853	0.00040989	4
8134880	MOSPD3	NM_023948	0.000411319	2
8049532	LRRFIP1	NM_001137550	0.000412474	8
8060286	DTYMK	NM_012145	0.000417621	2
8077262	DTYMK	NM_012145	0.000417621	2
8073890	GRAMD4	NM_015124	0.000417748	8
8096533	NA	ENST00000437802	0.00041861	7
8160258	NA	ENST00000384630	0.000422429	4
8108954	TCERG1	NM_006706	0.00042422	8
7896226	NA	NA	0.000425117	4
7894074	NA	NA	0.00042568	7
7977103	NA	NA	0.000425757	4
8001748	SNORA50	NR_002980	0.000426842	3
7939102	ELP4	NM_019040	0.000429406	7
8156521	NA	hsa-let-7f-1	0.000430578	3
7896423	NA	NA	0.000431218	3
7956930	DYRK2	NM_006482	0.000432803	6
7999319	CARHSP1	NM_014316	0.000434333	6
8055672	MMADHC	NM_015702	0.000439736	7
8140129	ABHD11	NR_026912	0.000442544	6
7895665	NA	NA	0.000443675	8
8144878	NA	ENST00000364287	0.000443802	3
7948139	NA	ENST00000423378	0.00044475	6
7895778	NA	NA	0.000447436	8
7944375	TRAPPC4	NM_016146	0.000448911	7
8053325	NA	BC024248	0.000450418	4
8166583	NA	NA	0.000450551	4
7935819	MRPL43	NM_032112	0.000451181	5
8126347	USP49	NM_018561	0.000456852	4
8131414	ZDHHC4	NM_001134387	0.000457897	5
8058518	NA	ENST00000459385	0.000458715	4
7953594	EMG1	NM_006331	0.000460089	7
7934505	C10orf55	NM_001001791	0.000461433	8
7895046	NA	NA	0.000463816	4
8157674	OR1N2	NM_001004457	0.00046426	4
7905525	LCE1B	NM_178349	0.000465191	4
7892870	NA	NA	0.000466489	8
7922343	TNFSF4	NM_003326	0.000468	8
8132218	BBS9	NM_198428	0.000469538	5
8101934	DNAJB14	NM_001031723	0.000469549	8
7999419	DEXI	NM_014015	0.000471294	7
7981439	BAG5	NM_001015049	0.000472917	7
8071289	COMT	NM_000754	0.000476276	2
8140386	STYXL1	NM_016086	0.000481827	5
8091715	LXN	NM_020169	0.000483078	5
8044143	C2orf40	NM_032411	0.000487665	5
8015078	KRT26	NM_181539	0.000488052	4
8017675	PLEKHM1P	NR_024386	0.000488791	8
8091402	TM4SF18	NM_138786	0.000492671	6
7971177	FOXO1	NM_002015	0.000493092	6
8117522	ABT1	NM_013375	0.000495374	2
7956159	RPL41	NM_001035267	0.000503942	5
7954481	SSPN	NM_005086	0.00050581	5
8055089	POLR2D	NM_004805	0.000509564	7
8173613	RLIM	NM_016120	0.000512653	1
8034342	ZNF625	AK292455	0.000515242	5
7911307	RPL23AP7	NR_024528	0.000515911	1
8006779	ARHGAP23	NM_020876	0.000517821	8
8169294	COL4A5	NM_000495	0.000522707	8
7919028	TBX15	NM_152380	0.000524273	4
7906305	NA	ENST00000424704	0.000525003	2
8022623	NA	ENST00000410645	0.000525548	4
8163402	ROD1	NM_005156	0.000526489	7
8014172	CCT6B	NM_006584	0.000527714	5
8041223	NA	ENST00000364801	0.000528721	4
7895162	NA	NA	0.000529476	7
8088864	NA	NA	0.000533042	4
8068168	SOD1	NM_000454	0.000534128	5
8068083	C21orf7	NM_020152	0.000536216	8
8166098	RAB9A	NM_004251	0.000539121	2
8031122	CNOT3	NM_014516	0.000540799	4
7900354	PPIE	NM_006112	0.000544094	7
8035553	COPE	NM_007263	0.000545677	2
7893268	NA	NA	0.000547507	2
7915170	MYCBP	NM_012333	0.000547532	5
7896657	NA	NA	0.000548158	2
7893238	NA	NA	0.000549553	7
8160472	TUSC1	NM_001004125	0.000550202	6
7984932	SCAMP5	NM_138967	0.000554513	6
7894023	NA	NA	0.000562268	6
8118622	HSD17B8	NM_014234	0.000568843	5
8178234	HSD17B8	NM_014234	0.000568843	5
8179534	HSD17B8	NM_014234	0.000568843	5
7968361	C13orf26	BC030277	0.0005733	5
7933180	ZNF239	NM_001099282	0.000575467	4
7940479	TMEM216	NM_016499	0.000575559	7
7893033	NA	NA	0.00057567	3
8055965	NA	ENST00000459490	0.000579683	3
7938195	NLRP14	NM_176822	0.000579759	5
8180319	TGIF1	NM_174886	0.00058138	7
8127079	GSTA5	NM_153699	0.000586539	5
8029615	NA	ENST00000384276	0.000587302	3
7973067	PNP	NM_000270	0.000588108	2
8174086	ARMCX6	NM_019007	0.000592321	8
8050495	NA	ENST00000384441	0.000596675	3
7893906	NA	NA	0.000597675	4
7896022	NA	NA	0.000600622	5
7943288	SRSF8	NM_032102	0.000611173	2
7905733	HAX1	NM_006118	0.000611528	7
7893001	NA	NA	0.000613826	1
7981978	SNORD116-15	NR_003330	0.000616096	5
8136967	OR2A5	NM_012365	0.000616228	4
8027642	PDCD2L	NM_032346	0.000616818	7
7923424	NA	ENST00000458934	0.000620161	4
8168432	RLIM	AF086467	0.000620329	7
8167924	UBQLN2	NM_013444	0.000621173	2
8029377	ZNF224	NM_013398	0.000628457	8
7938880	HTATIP2	NM_001098520	0.000641336	7
8145636	HMBOX1	NM_024567	0.000643381	3
8142899	ZC3HC1	NM_016478	0.000643546	4
8121734	ASF1A	NM_014034	0.000644766	7
7955896	COPZ1	NM_016057	0.000650081	7
8019273	THOC4	NM_005782	0.000660551	2
7991171	NA	ENST00000365211	0.000660566	3
7918367	GNAT2	NM_005272	0.000661181	4
8056043	NA	ENST00000410368	0.000661907	4
7927548	TIMM23	NM_006327	0.000664653	7
8074057	NA	ENST00000410861	0.000665033	4
8029489	BCAM	NM_005581	0.000669498	8
7991386	CIB1	NM_006384	0.000674234	5
8134376	ASB4	NM_016116	0.000676623	6
7916570	OMA1	NM_145243	0.000676648	5
8143747	NA	NA	0.000677542	4
7892919	NA	NA	0.000680236	6
8127370	KHDRBS2	NM_152688	0.000681465	4
7974603	PSMA3	NM_002788	0.000683259	7
8117929	ABCF1	NM_001025091	0.000690904	8
8177797	ABCF1	NM_001025091	0.000690904	8
8179112	ABCF1	NM_001025091	0.000690904	8
8095159	NA	ENST00000459077	0.000693289	3
8164896	SURF1	NM_003172	0.000694378	5
7970426	NA	ENST00000410436	0.000696791	3
7893461	NA	NA	0.00069921	1
7916262	C1orf123	BC010908	0.000701678	5
8143986	NA	ENST00000458808	0.000705562	3
7892983	NA	NA	0.000706485	7
8043491	TEKT4	NM_144705	0.000706715	6
7915227	SNORA55	NR_002983	0.000708964	4
8150276	PPAPDC1B	NM_001102559	0.0007094	5
7893400	NA	NA	0.000711121	4
7897172	TPRG1L	NM_182752	0.000711842	5
7912473	FBXO2	NM_012168	0.000715368	6
8134730	CNPY4	NM_152755	0.000716219	5
8019772	THOC4	NM_005782	0.000716973	2
8066384	GTSF1L	NM_176791	0.000719148	4
7968242	GTF3A	NM_002097	0.0007266	7
7894356	NA	NA	0.000726925	3
7917647	NA	ENST00000361447	0.00072752	4
8060274	THAP4	NM_015963	0.000731913	2
8077250	THAP4	NM_015963	0.000731913	2
8070557	ZNF295	NM_001098402	0.0007338	7
7904500	NA	ENST00000436832	0.000741931	3
8051215	RBKS	NM_022128	0.000742697	5
7894479	NA	NA	0.000744714	7
7993185	NUBP1	NM_002484	0.000745271	7
7936661	PRDX3	NM_006793	0.000746551	7
7931822	LOC100128356	AY423624	0.000749478	4
8045171	IMP4	NM_033416	0.000754189	2
7896730	NA	NA	0.000755801	6
8082305	CHCHD6	NM_032343	0.000757642	5
7894913	NA	NA	0.000758179	4
7943740	C11orf88	NM_207430	0.000759938	5
8101862	ADH6	NM_001102470	0.000760126	5
8090509	RAB7A	NM_004637	0.000763649	1
8131179	TTYH3	NM_025250	0.000767308	8
7944216	ATP5L	NM_006476	0.000768449	7
7893136	NA	NA	0.000768511	3
7894808	NA	NA	0.00077446	2
8146388	FLJ46365	AK128232	0.00078259	4
8175330	NA	ENST00000364570	0.000788059	4
7896094	NA	NA	0.000788843	1
8098240	NA	NA	0.000792621	8
8053107	DCTN1	NM_004082	0.000792824	8
8046906	GULP1	NM_016315	0.000793521	5
7939873	OR4C3	NM_001004702	0.000798002	4
7964522	CDK4	NM_000075	0.00079822	2
8079993	CYB561D2	NM_007022	0.000798722	2
8029996	C19orf68	BC043386	0.000799246	4
7896432	NA	NA	0.000801484	8
8150157	NA	ENST00000391105	0.00080279	6
8154727	LOC138412	AF091236	0.000809628	6
8173513	RPS4X	NM_001007	0.000811278	1
7892920	NA	NA	0.000813639	3
7896575	NA	NA	0.000815953	3
8034101	TMED1	NM_006858	0.000821957	2
7992205	UBE2I	NM_194259	0.000824086	2
8014073	C17orf79	NM_018405	0.000824693	5
7972921	NA	ENST00000365477	0.000829019	3
8055402	NA	ENST00000364438	0.000829699	3
8104912	SKP2	NM_005983	0.000833046	7
8163084	NA	ENST00000364357	0.000834549	4
8096077	NA	ENST00000365615	0.000844608	3
8083119	RNF7	NM_014245	0.000850322	7
7940323	MS4A8B	NM_031457	0.00085844	5
7950197	ARAP1	NM_015242	0.000858764	8
7895602	NA	NA	0.000861272	7
8128606	RTN4IP1	NM_032730	0.000861709	5
7896069	NA	NA	0.000862879	7
7900212	NA	ENST00000363926	0.000863832	4
7960575	NOP2	NM_001033714	0.000864602	8
8132922	MRPS17	NM_015969	0.000867057	7
8036436	ZNF607	NM_032689	0.00087285	5
8111099	NA	GENSCAN00000039269	0.000875364	6
7980051	C14orf43	NM_194278	0.000875391	8
8174983	NA	ENST00000364648	0.000878188	3
7895881	NA	NA	0.000878639	2
7981059	SERPINA6	NM_001756	0.000881684	6
7915955	SPATA6	NM_019073	0.000890922	5
7896182	NA	NA	0.000896995	3
8068410	MEMO1	NM_015955	0.000900965	2
8071547	UBE2L3	NM_198157	0.000904729	7
8063601	C20orf85	NM_178456	0.000910337	5
8177096	RBMY1A3P	NR_001547	0.000912763	4
7894800	NA	NA	0.000914885	6
7990086	THAP10	NM_020147	0.000916368	5
8165486	TMEM203	NM_053045	0.000917548	7
8157679	OR1Q1	NM_012364	0.000919235	4
7899173	DHDDS	NM_024887	0.000922741	8
7896438	NA	NA	0.000923379	1
7978201	NEDD8	NM_006156	0.000923916	7
7922416	SNORD75	NR_003941	0.000924386	3
8131860	C7orf30	BC012331	0.000925879	7
8028172	CAPNS1	NM_001749	0.000926907	7
7910385	NA	uc001hte	0.000929286	2
7960516	NA	ENST00000441874	0.000929933	6
7918151	NA	NA	0.000932976	6
7913787	C1orf201	BC063891	0.000934291	5
8055312	NA	NA	0.00093436	4
7895384	NA	NA	0.000939297	4
7893479	NA	NA	0.000940145	4
8002760	NA	ENST00000412576	0.000942943	1
8157477	DEC1	NM_017418	0.000944084	4
8174494	NA	NA	0.000945003	6
7935056	NA	ENST00000364542	0.000950271	3
7969914	NA	ENST00000459526	0.000950702	4
7896511	NA	NA	0.000952765	1
7905500	LCE2D	NM_178430	0.000955212	4
7985352	C15orf26	AK302120	0.000956607	5
8132642	PPIA	NM_021130	0.000957614	2
8029306	LOC390940	AK129550	0.000962128	5
8123080	SYTL3	NM_001009991	0.000965392	5
8116593	NA	ENST00000457049	0.000965512	4
7907549	TNN	NM_022093	0.000965764	4
7893311	NA	NA	0.000966383	3
8180317	TGIF1	NM_173210	0.000969371	7
7941976	NDUFS8	NM_002496	0.000974278	2
8138824	SCRN1	NM_014766	0.000986335	5
7971858	NA	ENST00000334406	0.000986511	1
7942781	NA	ENST00000363983	0.00098684	3
8104234	TRIP13	NM_004237	0.000987273	5
8133413	LIMK1	NM_002314	0.000991584	8
8044191	SLC5A7	NM_021815	0.000993709	8
8149067	NA	NA	0.000993797	4
7979804	NA	ENST00000410452	0.000994373	3
8122966	CLDN20	NM_001001346	0.000994403	4
7895629	NA	NA	0.000995995	8
8087885	BAP1	NM_004656	0.000997544	8
7896421	NA	NA	0.00100004	8
8039010	ZNF701	NM_018260	0.00100699	8
7972737	LIG4	NM_002312	0.00101437	7
7895110	NA	NA	0.00102511	7
8139203	C7orf11	NM_138701	0.00102612	7
8157608	NA	ENST00000411038	0.00102928	4
7894950	NA	NA	0.00103351	3
8093145	C3orf34	NM_032898	0.00103474	5
8067040	NFATC2	NM_012340	0.00103766	5
7893475	NA	NA	0.00103925	4
8014257	SLFN12L	NM_001145027	0.00104287	2
7896477	NA	NA	0.00104646	6
8146967	CRISPLD1	NM_031461	0.00104683	5
8073032	TOMM22	NM_020243	0.00104727	7
7895653	NA	NA	0.0010477	6
7895977	NA	NA	0.00104991	3
8004024	GP1BA	NM_000173	0.00105075	8
7942476	PAAF1	NM_025155	0.00105406	7
7893933	NA	NA	0.00105793	8
7896682	NA	NA	0.001061	3
7902269	SRSF11	NM_004768	0.00106555	3
7893716	NA	NA	0.00106603	4
7895610	NA	NA	0.00106664	7
8143035	NA	ENST00000448615	0.00106855	1
8014197	NA	ENST00000459539	0.00106875	3
7895576	NA	NA	0.00107151	3
8084100	USP13	NM_003940	0.00107168	2
7972682	KDELC1	NM_024089	0.00107473	2
7997374	DYNLRB2	NM_130897	0.00107927	5
7930872	NANOS1	NM_199461	0.00108912	6
8038382	PIH1D1	NM_017916	0.00109025	2
7960131	NA	ENST00000425052	0.00109285	1
8078134	NA	NA	0.00109985	3
8006655	DHRS11	NM_024308	0.00110047	6
7892681	NA	NA	0.00110463	4
7894633	NA	NA	0.00110891	4
8142102	ATXN7L1	NM_020725	0.0011091	5
7910369	HIST3H2BB	NM_175055	0.00111043	5
8005736	NA	AK127995	0.00111707	6
7905395	PSMB4	NM_002796	0.00112327	7
7892841	NA	NA	0.00112409	2
8149762	TNFRSF10A	NM_003844	0.00112979	4
7972867	PCID2	NM_001127202	0.00113146	5
8039625	ZIM3	NM_052882	0.00113279	4
8070141	CRYZL1	NM_145858	0.00113326	5
7925790	NA	ENST00000363625	0.00113372	4
7989245	HSP90AB4P	NR_002927	0.0011427	4
8119898	VEGFA	NM_001025366	0.00114434	8
8103166	SH3D19	NM_001009555	0.00114767	5
8169904	SLC25A14	NM_003951	0.00114791	5
8139160	FAM183B	NM_001105282	0.00114843	5
8112107	PPAP2A	NM_003711	0.00115253	7
8067206	HMGB1L1	NM_001008735	0.0011526	8
7964736	HMGA2	AY601863	0.00115673	4
8096030	NA	ENST00000391318	0.0011628	4
7950524	MAP6	NM_207577	0.00116298	5
7993608	COQ7	NM_016138	0.00116751	5
7904755	PEX11B	NM_003846	0.00116973	7
7930612	NA	ENST00000391287	0.00117895	4
8048980	CAB39	NM_016289	0.00118119	7
8138547	TOMM7	NM_019059	0.00118183	2
8171846	NA	ENST00000419089	0.00118508	2
8053984	ANKRD23	NM_144994	0.00118557	4
8003217	COX4NB	NM_006067	0.00118626	5
8082663	NUDT16P1	NR_027766	0.00118891	6
8104580	FAM105B	NM_138348	0.00118941	8
8015712	CCDC56	NM_001040431	0.00119087	5
7893723	NA	NA	0.00119418	4
7908779	RNPEP	NM_020216	0.0011942	5
8135405	GPR22	NM_005295	0.00119998	3
7900546	PPCS	NM_024664	0.00120534	7
8120271	FBXO9	AK095307	0.00120964	3
8016600	TAC4	NM_170685	0.00121389	4
7894845	NA	NA	0.0012148	8
7892628	NA	NA	0.00121881	6
7894995	NA	NA	0.0012191	4
8095868	LOC100131826	AY358789	0.00122149	3
7897404	PARK7	NM_007262	0.00122395	5
8149315	NA	BC132953	0.00122522	4
7896221	NA	NA	0.00122785	4
7895057	NA	NA	0.00122829	8
7947867	PSMC3	NM_002804	0.00122913	7
7946013	OR51G1	NM_001005237	0.00122931	4
7893288	NA	NA	0.0012319	6
8101616	C4orf36	NM_144645	0.00123847	5
7916898	DEPDC1	NM_001114120	0.00124676	2
8079294	EXOSC7	NM_015004	0.00124682	7
8128007	GJB7	NM_198568	0.00124849	5
8016787	NA	ENST00000459088	0.00124876	4
8023191	SMAD2	NM_005901	0.00126034	5
8180202	PIGF	NM_002643	0.00126308	7
8180258	PIGF	NM_002643	0.00126308	7
7986767	NA	BC069077	0.00126465	4
7896362	NA	NA	0.00126829	8
7895183	NA	NA	0.00126833	3
7985898	WDR93	NM_020212	0.00127232	5
7987449	SRP14	NM_003134	0.00127284	6
8089040	MINA	NM_001042533	0.0012812	7
8096251	NUDT9	NM_024047	0.00128335	7
8039909	CCNL2	NM_001039577	0.00128436	8
7893071	NA	NA	0.00128681	4
8030364	SNORD34	NR_000019	0.00128932	2
8071595	NA	NA	0.00129585	3
8151540	NA	uc003yce	0.00129652	2
8156571	NA	hsa-mir-27b	0.00129756	8
7893593	NA	NA	0.00129992	5
7935139	PIPSL	NR_002319	0.00130627	2
8004699	CHD3	NM_001005273	0.00130924	8
7967149	ANAPC5	NM_016237	0.00131097	5
7938295	RPL27A	NM_000990	0.00131243	6
7895638	NA	NA	0.00131989	3
8141717	FIS1	NM_016068	0.00132079	5
7893524	NA	NA	0.00132774	3
8101699	NA	AK092450	0.0013286	2
8067495	CABLES2	NM_031215	0.00132995	4
7893168	NA	NA	0.00133464	3
8043197	VAMP8	NM_003761	0.00134079	7
8129610	TAAR2	NM_001033080	0.00134248	4
7893762	NA	NA	0.00134285	7
7892548	NA	NA	0.00134294	3
8164698	MED27	NM_004269	0.00134837	2
7956639	TSFM	NM_005726	0.00135049	2
8071272	GP1BB	L20860	0.00135807	4
8121112	NA	ENST00000410598	0.00135859	4
7989315	GTF2A2	NM_004492	0.00136126	7
8009951	ITGB4	NM_000213	0.00136206	8
8123884	C6orf52	NM_001145020	0.00137597	5
8166630	NA	ENST00000378958	0.00137663	6
8021185	NA	NA	0.00137734	4
7917472	GTF2B	NM_001514	0.0013782	7
8129037	NA	ENST00000384317	0.00138039	4
7895347	NA	NA	0.00138598	7
8133345	WBSCR22	NM_017528	0.00139252	5
8138151	MGC72080	NR_002822	0.00139616	5
7954132	C12orf60	NM_175874	0.00139809	5
8136580	RAB19	NM_001008749	0.00139814	4
8020183	IMPA2	NM_014214	0.00139833	2
7990054	UACA	NM_018003	0.00140045	5
8046685	UBE2E3	NM_182678	0.00140603	1
7980574	NA	NA	0.00141986	6
7910520	GNPAT	NM_014236	0.00142731	7
8103722	HSP90AA6P	AY956762	0.00143025	6
8125870	TCP11	NM_001093728	0.0014335	6
7986687	WHAMML1	NR_003521	0.00144335	8
7894419	NA	NA	0.00144977	8
7957549	NA	AK094874	0.00145089	5
7976571	C14orf129	NM_016472	0.00145448	7
8026051	RNASEH2A	NM_006397	0.00146003	2
8126147	C6orf64	BC022007	0.00146487	2
8013860	MYO18A	NM_078471	0.0014653	8
8126524	C6orf108	NM_199184	0.0014685	5
8030969	NA	ENST00000344759	0.0014686	5
7895846	NA	NA	0.00148545	7
7893539	NA	NA	0.00148577	7
7942332	FOLR1	NM_016730	0.00150041	5
8002939	NA	ENST00000362429	0.00150157	4
8146216	VDAC3	NM_001135694	0.00150524	5
7896286	NA	NA	0.0015072	4
8061497	FRG1B	NR_003579	0.00150787	8
7937217	ECHS1	NM_004092	0.00150801	2
8132070	GARS	NM_002047	0.00151221	7
7893952	NA	NA	0.00151337	1
8052022	RPL18A	AY779046	0.00151756	6
8141380	ZNF3	NM_032924	0.00151765	5
7942858	ANKRD42	NM_182603	0.00151797	5
8170775	SSR4	NM_006280	0.00151974	2
7986757	NDN	NM_002487	0.00152576	7
8160587	NDUFB6	NM_002493	0.00152768	7
7893424	NA	NA	0.00152777	1
8058335	SUMO1	NM_003352	0.00153513	7
7894423	NA	NA	0.00153604	4
8076547	TTLL1	NR_027779	0.00153675	5
7990029	NA	NA	0.00153877	4
7893437	NA	NA	0.00154294	3
7928661	MBL1P	NR_002724	0.00154543	5
7911539	CCNL2	NM_001039577	0.00155106	8
7896521	NA	NA	0.00155158	2
8019250	P4HB	NM_000918	0.00155182	8
8053666	NA	ENST00000384620	0.00155981	4
7894196	NA	NA	0.0015636	3
8174235	TCEAL5	NM_001012979	0.00156602	4
8065122	NA	ENST00000390863	0.00156817	4
8108733	PCDHB12	NM_018932	0.00156995	4
8111666	NA	ENST00000410811	0.00157659	3
8061262	NAA20	NM_016100	0.00158521	5
8127399	EYS	NM_001142800	0.00158527	4
8070579	TFF1	NM_003225	0.00158528	2
7923516	CYB5R1	NM_016243	0.00159058	5
8162490	HIATL1	NM_032558	0.00159663	5
8105504	FAM133B	NM_152789	0.0016017	3
7896206	NA	NA	0.00160569	3
8133690	MDH2	NM_005918	0.00160631	7
7949995	MRPL21	NM_181515	0.00160711	7
7901601	MRPL37	NM_016491	0.00161582	7
8139786	NA	NA	0.00161823	4
8173912	RPSAP15	AF284768	0.00161948	6
7965431	CLLU1OS	NM_001025232	0.00162004	4
7990436	COX5A	NM_004255	0.00162989	2
7895961	NA	NA	0.00163089	3
7899422	DNAJC8	NM_014280	0.0016347	2
7961365	MANSC1	NM_018050	0.00163845	2
8123101	NA	ENST00000367073	0.00163987	5
7976744	YY1	NM_003403	0.0016456	8
8136811	EPHB6	NM_004445	0.00164994	4
7913694	FUCA1	NM_000147	0.00165293	7
7894107	NA	NA	0.00165457	7
7982096	SNORD115-48	NR_003362	0.00165783	4
8105935	POM121L8P	AK302597	0.00166222	4
7893135	NA	NA	0.00167024	6
7967976	SAP18	NM_005870	0.00167372	7
8124423	HIST1H2BG	NM_003518	0.0016747	2
8138258	VWDE	NM_001135924	0.00168357	8
7893926	NA	NA	0.00168414	8
7903391	NA	ENST00000391275	0.00168519	4
7896105	NA	NA	0.00168613	4
7895180	NA	NA	0.00168727	7
8047372	NDUFB3	NM_002491	0.00170157	7
8041570	TMEM178	NM_152390	0.00171502	6
8169640	SLC25A5	NM_001152	0.00171723	2
8013581	IFT20	NM_174887	0.00172943	7
8105577	NA	ENST00000362409	0.00173081	4
7895950	NA	NA	0.00173459	4
8115895	KIAA1191	NM_020444	0.0017376	7
7895981	NA	NA	0.00173892	5
8115918	CLTB	NM_007097	0.00173976	8
8151252	NA	GENSCAN00000062703	0.00174223	2
7990683	ACSBG1	NM_015162	0.00174243	5
8097507	RAB33B	NM_031296	0.00174643	2
7907439	PRDX6	NM_004905	0.00175694	5
7948119	OR8J3	NM_001004064	0.00175718	4
8106999	C5orf27	NR_026936	0.00176188	8
7936134	OBFC1	NM_024928	0.00177025	7
8170428	MTM1	NM_000252	0.00177288	5
8154012	KANK1	NM_153186	0.00177514	8
8139903	NA	NA	0.00177522	4
7919139	LOC375010	AK090412	0.00177758	3
8138592	TRA2A	AB052759	0.00177987	3
7942453	PLEKHB1	NM_021200	0.00178376	5
8108376	NA	ENST00000459407	0.00178544	4
8016628	PPP1R9B	NM_032595	0.00179018	8
8155696	FAM122A	NM_138333	0.001794	5
7903582	RPL17	NM_001035006	0.00179984	1
8011011	YWHAE	NR_024058	0.00180269	1
7902036	NA	NA	0.00180284	4
7893225	NA	NA	0.00180407	3
7896729	NA	NA	0.00181945	5
7915425	ZMYND12	NM_032257	0.00181995	5
8042696	SPR	NM_003124	0.00182203	2
8092314	DNAJC19	NM_145261	0.00182453	1
7893392	NA	NA	0.00182453	5
7955502	SCN8A	NM_014191	0.00182798	4
7939569	PRDM11	NM_020229	0.00183167	4
7893008	NA	NA	0.00183267	6
8058869	TNS1	NM_022648	0.00183322	8
7972650	FGF14	NM_175929	0.00183498	5
8155458	RBPJ	D14041	0.00183589	6
8048518	TUBA4B	NR_003063	0.00184542	5
8142876	NA	NA	0.00184542	4
7902721	CLCA1	NM_001285	0.00184755	6
7991427	VPS33B	NM_018668	0.00184802	5
8160597	TAF1L	NM_153809	0.00185301	4
8123494	FAM120B	NM_032448	0.00185659	5
8086218	NA	ENST00000362644	0.00185665	6
7921862	C1orf192	NM_001013625	0.00186621	5
7906642	KLHDC9	NM_152366	0.00187039	5
8164013	STRBP	NM_018387	0.00187401	5
8180318	TGIF1	NM_173211	0.00187561	7
7895404	NA	NA	0.00187701	1
8124183	NA	ENST00000410499	0.00187731	4
8080138	IQCF2	NM_203424	0.00188128	4
7893331	NA	NA	0.00188376	3
7989975	CLN6	NM_017882	0.00188382	8
8164067	PSMB7	NM_002799	0.00188598	7
7905406	CGN	NM_020770	0.00189168	8
7961295	TAS2R43	NM_176884	0.00189684	4
8127787	IBTK	NM_015525	0.00189764	7
7959751	ZNF664	NM_152437	0.00189893	5
8130438	TFB1M	NM_016020	0.00190251	7
8002667	PMFBP1	NM_031293	0.00190637	3
7984989	COMMD4	NM_017828	0.00190654	2
7948326	OR5B2	NM_001005566	0.00191352	4
8110486	ZNF879	AK300504	0.00191421	8
8073645	SAMM50	NM_015380	0.00191439	7
7896698	NA	NA	0.00192381	8
8156761	NANS	NM_018946	0.0019242	5
7967987	MRP63	NM_024026	0.00195524	5
7896565	NA	NA	0.00195691	3
7940996	PRDX5	NM_012094	0.00195739	5
8045083	SFT2D3	NM_032740	0.00196193	2
8105828	CCNB1	NM_031966	0.00196465	7
7932067	NA	ENST00000363415	0.00197037	3
7893010	NA	NA	0.00197775	6
8124406	HIST1H2BC	NM_003526	0.00197982	2
7893606	NA	NA	0.00198049	3
8090098	MYLK	NM_053025	0.00199049	5
7894183	NA	NA	0.00199431	3
8013747	PROCA1	NM_152465	0.00199943	4
8068057	NCRNA00161	NR_026552	0.00201057	3
8175593	IDS	NM_000202	0.00201114	5
7939983	OR8U1	NM_001005204	0.00201158	4
7901227	NA	NA	0.00201427	3
8159848	NA	ENST00000411041	0.00202081	4
7893181	NA	NA	0.00202153	7
8176553	TTTY8	NR_001533	0.00202386	4
8177048	TTTY8	NR_001533	0.00202386	4
7979694	NA	uc001xit	0.00202551	2
8035787	NA	NA	0.00202713	3
7931863	ASB13	NM_024701	0.00202804	2
8058333	NA	ENST00000433982	0.00203134	7
8052784	NFU1	NM_015700	0.00203443	7
8006237	NA	ENST00000433145	0.0020356	5
7928545	LOC100128292	NR_024585	0.00203739	5
8164002	ZBTB26	NM_020924	0.00205034	4
7976200	CALM1	NM_006888	0.00205077	5
8115261	CCDC69	NM_015621	0.00205596	8
7918757	DENND2C	BC063894	0.00206802	4
7967193	MORN3	NM_173855	0.00206934	5
8001163	MYLK3	NM_182493	0.0020716	6
8137474	ACTR3B	NM_020445	0.00207167	5
7946330	OR10A6	NM_001004461	0.00207186	4
7970139	C13orf16	BC029889	0.00207315	4
8087790	RRP9	NM_004704	0.00207386	5
7924888	HIST3H2A	NM_033445	0.00207396	5
8159702	EHMT1	NM_024757	0.00207563	4
8104615	NA	ENST00000330110	0.00207946	4
7894518	NA	NA	0.00208301	1
7892977	NA	NA	0.00208391	1
7954961	NA	NA	0.00208537	4
8052562	CCT4	NM_006430	0.00208901	7
8110123	FAM153B	NM_001079529	0.00209203	4
7895186	NA	NA	0.00209284	4
8133215	STAG3L4	NM_022906	0.0020992	5
8006592	NA	ENST00000411323	0.00210195	4
8103240	ANXA2P1	NR_001562	0.0021024	5
7903090	NA	ENST00000384649	0.00210394	4
7893682	NA	NA	0.00210865	7
7975956	GSTZ1	NM_001513	0.00211572	2
8124129	NHLRC1	NM_198586	0.00212366	2
7953166	TSPAN9	NM_006675	0.00212741	4
7892882	NA	NA	0.00213193	7
7961865	KRAS	NM_033360	0.00213985	7
7895873	NA	NA	0.00214821	7
8022277	NA	ENST00000411133	0.00214912	3
8108205	FBXL21	NM_012159	0.00214997	4
7948330	OR5B21	NM_001005218	0.00215052	4
8035628	NR2C2AP	NM_176880	0.00215093	5
7948211	SSRP1	AB209132	0.00215344	3
8051777	COX7A2L	NM_004718	0.00215773	2
7893578	NA	NA	0.0021599	8
7893956	NA	NA	0.0021606	1
8114898	NA	NA	0.00216247	4
8027390	POP4	NM_006627	0.00216448	7
7893790	NA	NA	0.00217196	8
7970381	ANKRD20B	NR_003366	0.00217237	3
7894354	NA	NA	0.00217337	3
7938286	RPL27A	NM_000990	0.00217533	2
8174509	GNG5	NM_005274	0.00218128	7
8085300	SEC13	NR_024272	0.0021872	2
7894737	NA	NA	0.00218886	7
8022326	MPPE1	NM_023075	0.00219323	7
7896040	NA	NA	0.00219513	3
7895168	NA	NA	0.00219821	8
8119227	ZFAND3	NM_021943	0.00219823	7
8138842	NOD1	NM_006092	0.00219948	4
7894312	NA	NA	0.00220219	3
7932209	NA	ENST00000342858	0.0022024	5
7934178	PCBD1	NM_000281	0.0022026	5
7947784	ARFGAP2	NM_032389	0.00220611	4
8054354	NA	NA	0.00221466	6
7912625	NA	NA	0.00222559	4
7918813	NRAS	NM_002524	0.00222581	7
8091556	NA	ENST00000384593	0.00223671	4
7948037	NA	NA	0.00223711	3
8136140	NRF1	NM_005011	0.00224007	5
8003722	SRR	NM_021947	0.00224364	7
7894413	NA	NA	0.00224513	2
8139232	PSMA2	NM_002787	0.00224725	7
8160439	NA	hsa-mir-31	0.00224754	3
8127502	C6orf155	NR_026807	0.00225223	3
7962367	ZCRB1	NM_033114	0.00226147	1
7895623	NA	NA	0.00226159	4
7945989	NA	ENST00000324875	0.00226628	4
8083850	NA	ENST00000442408	0.00226741	5
7955179	TUBA1C	NM_032704	0.00227042	2
8180316	TGIF1	NM_173209	0.00227158	7
8095819	FAM47E	NM_001136570	0.00227218	5
7892536	NA	NA	0.00227818	2
7963631	RARG	NM_000966	0.00228668	4
8109475	MRPL22	NM_014180	0.00228883	7
7894017	NA	NA	0.00229138	4
8020252	NA	ENST00000364596	0.00229457	6
7923810	NA	ENST00000365074	0.00229525	3
7964203	BAZ2A	NM_013449	0.00230196	8
7988077	LCMT2	NM_014793	0.00230373	7
8142100	ATXN7L1	NM_020725	0.00230443	5
8146069	ADAM18	NM_014237	0.00230519	4
8097252	BBS12	NM_152618	0.00230952	5
7940626	SCGB2A1	NM_002407	0.00231003	5
7910012	NA	ENST00000459357	0.00231184	4
7921916	RGS5	NM_003617	0.00231501	5
8084345	AP2M1	NM_004068	0.00231708	8
8159846	NA	NA	0.00232209	4
7893271	NA	NA	0.00232387	5
7954006	NA	ENST00000397627	0.00232869	8
7942932	C11orf73	NM_016401	0.00233035	7
8054762	RPL23AP7	NR_024528	0.00234251	1
8007454	RND2	NM_005440	0.00234288	6
8026548	AP1M1	NM_001130524	0.00234942	2
8167185	TIMP1	NM_003254	0.0023853	2
8131000	HEATR2	NM_017802	0.00238673	6
7993713	IQCK	NM_153208	0.00239044	5
8154654	C9orf53	NR_024274	0.002392	4
8135774	PTPRZ1	NM_002851	0.00239221	8
8120468	BAI3	NM_001704	0.00240082	4
7942315	LRTOMT	NM_001145309	0.00240193	5
7892874	NA	NA	0.0024086	4
8000192	NA	ENST00000198767	0.00240948	8
7893973	NA	NA	0.00241091	7
7895549	NA	NA	0.00241139	4
8050474	RDH14	NM_020905	0.00241168	7
7920552	KCNN3	NM_002249	0.00241665	6
7974054	SIP1	NM_003616	0.00242224	7
8094872	NA	NA	0.00242517	4
7895015	NA	NA	0.00243534	3
8146738	C8orf45	NM_001136161	0.0024371	5
8046500	NA	ENST00000437565	0.00245474	6
8003922	MED11	NM_001001683	0.00245809	2
7940688	POLR2G	NM_002696	0.00245916	7
7957649	SNRPF	NM_003095	0.00246764	7
7893205	NA	NA	0.00246872	1
7899273	NUDC	NM_006600	0.00247546	5
8105348	GPX8	NM_001008397	0.0024797	7
7932017	NA	ENST00000391203	0.00248725	3
7893683	NA	NA	0.0024925	3
7950086	NUMA1	NM_006185	0.00249301	8
7894850	NA	NA	0.00250619	3
7894268	NA	NA	0.00250623	4
8116969	NOL7	NM_016167	0.00250798	1
7963988	SMARCC2	NM_003075	0.00250824	8
7893953	NA	NA	0.00250861	4
7895179	NA	NA	0.00251734	6
7894944	NA	NA	0.00252617	2
8157454	ATP6V1G1	NM_004888	0.00252785	7
7938055	NA	ENST00000317102	0.00253461	4
7935510	MORN4	NM_178832	0.00253698	5
8169445	NA	ENST00000449911	0.00253912	6
8148263	TRMT12	NM_017956	0.0025397	7
7944525	NA	ENST00000362347	0.0025404	3
7986446	ALDH1A3	NM_000693	0.0025407	2
8069633	ATP5J	NM_001003703	0.00254236	7
8070194	RUNX1	NM_001001890	0.00254435	8
7958819	ERP29	NM_006817	0.00255615	7
8142930	TSGA14	NM_018718	0.00256048	5
7948987	PLA2G16	NM_007069	0.00256211	5
8041561	MORN2	NM_001145450	0.00256733	5
8171823	APOO	NM_024122	0.00256877	5
8069764	NA	ENST00000365114	0.00257185	4
7907680	FAM20B	NM_014864	0.00258074	7
8157144	C9orf6	NM_017832	0.0025814	5
8029884	SAE1	NR_027280	0.00258678	2
8097570	USP38	NM_032557	0.0025907	7
8180312	SKP1	NM_170679	0.00259625	1
8058342	NA	NA	0.00260818	3
7951036	SNORD5	NR_003033	0.00260856	3
7947934	MTCH2	NM_014342	0.00261926	7
7992458	NA	ENST00000411073	0.00262068	4
8017597	NA	ENST00000443085	0.00262471	3
8080991	HNRNPA3	NM_194247	0.0026309	8
8138145	MGC72080	NR_002822	0.00263906	5
7894572	NA	NA	0.00264616	4
8031029	NA	hsa-mir-520c	0.00265008	4
7895262	NA	NA	0.00265577	3
8021919	TUBB4Q	NM_020040	0.00266047	6
8036029	NA	ENST00000334591	0.00266171	6
8056491	SCN9A	NM_002977	0.0026621	8
8053347	NA	NA	0.00266321	4
8030578	NA	ENST00000377006	0.00266844	5
8113981	P4HA2	NM_004199	0.00266951	5
8105989	POM121L8P	AK302597	0.00267162	4
7950294	CHCHD8	NM_016565	0.00268137	2
8067279	CTSZ	NM_001336	0.00268209	2
8136790	NA	NA	0.00268301	4
7978260	DHRS1	NM_001136050	0.00268317	2
8036689	FBXO27	NM_178820	0.002689	5
8028002	NA	NA	0.00269301	6
8158952	EEF1A1	NM_001402	0.00269499	1
8154359	RPL18A	AY779046	0.00269921	6
8083616	MLF1	NM_001130157	0.00269962	5
7911559	MRPL20	NM_017971	0.00270147	7
8039939	MRPL20	NM_017971	0.00270147	7
7943158	SCARNA9	NR_002569	0.00270244	8
7943387	C11orf70	BC006128	0.00270246	5
7895439	NA	NA	0.00271862	8
7968297	POMP	NM_015932	0.00272812	7
8158059	STXBP1	NM_003165	0.00273147	5
8108737	PCDHB13	NM_018933	0.00273235	5
8016825	COX11	NM_004375	0.00273811	7
8063000	WFDC2	NM_006103	0.00274599	2
7944801	OR10G8	NM_001004464	0.00274771	4
8102037	NA	ENST00000458860	0.00276648	3
8081316	TFG	NM_006070	0.00276802	7
8145818	NA	NA	0.00277577	4
7894952	NA	NA	0.00278359	3
7915331	NA	NA	0.00278746	4
7893293	NA	NA	0.00278911	6
8108861	NDFIP1	NM_030571	0.0028173	7
8148313	NA	ENST00000391149	0.00281938	3
8103802	SPATA4	NM_144644	0.00283496	5
7894806	NA	NA	0.00283863	8
8028705	TIMM50	NM_001001563	0.00284227	2
7896561	NA	NA	0.00284601	2
7896396	NA	NA	0.00285766	6
8096580	MTTP	NM_000253	0.00286263	5
7896533	NA	NA	0.00286852	7
7895467	NA	NA	0.00288534	3
7908347	OCLM	NM_022375	0.00288751	3
7894807	NA	NA	0.0028888	3
8022892	ZNF396	NM_145756	0.00289055	5
7899375	NA	ENST00000411130	0.00289188	6
7973371	C14orf119	BC009645	0.00289268	7
7988348	NA	NA	0.00289309	3
8139727	41166	NM_207366	0.00289727	4
8005814	NLK	NM_016231	0.00289959	7
7933723	IPMK	NM_152230	0.00290052	5
8002444	VAC14	AK128439	0.0029031	4
7920515	UBE2Q1	NM_017582	0.00290755	7
7895444	NA	NA	0.00290939	8
8062748	IFT52	NM_016004	0.00291287	5
7894715	NA	NA	0.00292775	4
8071086	CECR2	NM_031413	0.00292809	4
8173041	FAM120C	NM_017848	0.00294443	4
7959146	NME2P1	NR_001577	0.00294477	2
8100941	NA	NA	0.00295658	4
7892901	NA	NA	0.00295919	7
7991835	TMEM8A	BC146939	0.00297195	1
8003859	NA	ENST00000384660	0.00298001	8
8139758	CHCHD2	NM_016139	0.00298328	7
8169221	CXorf41	BC033510	0.00298495	5
8106769	LOC645181	XR_019029	0.00298597	8
8015969	UBTF	NM_014233	0.00299411	8
8072577	YWHAH	NM_003405	0.00299556	2
8177261	TTTY10	NR_001542	0.00299606	4
7896601	NA	NA	0.00299606	3
7994928	PHKG2	NM_000294	0.00299973	5
8108422	NA	ENST00000362675	0.00300363	3
7893045	NA	NA	0.00300716	4
7892978	NA	NA	0.00301175	3
7930921	BAG3	NM_004281	0.0030144	2
7896083	NA	NA	0.00302874	3
8081427	NA	ENST00000365052	0.00303062	4
7894577	NA	NA	0.00303223	3
7893180	NA	NA	0.00303901	4
7979033	SAV1	NM_021818	0.00305418	5
8147693	NACAP1	NR_002182	0.00305464	6
8158372	SET	NM_003011	0.0030589	8
8000848	CD2BP2	NM_006110	0.0030701	2
8053366	SUCLG1	NM_003849	0.00307321	7
8138531	EEF1A1	NM_001402	0.0030741	1
7892501	NA	NA	0.00307887	1
8155881	NA	NA	0.0030833	6
7932832	NA	ENST00000364017	0.00310939	4
7997498	NA	NA	0.00311874	4
7912196	NA	ENST00000410579	0.00312878	3
8089993	WDR5B	NM_019069	0.00313189	5
7958989	PLBD2	NM_173542	0.00314891	8
8108900	HMHB1	NM_021182	0.00315356	4
8073578	C22orf32	BC024237	0.00315604	5
7936809	FAM24B	NM_152644	0.00316337	2
8123985	NOL7	NM_016167	0.00316491	1
8119336	NA	ENST00000410625	0.00318261	4
7894425	NA	NA	0.00318545	4
7893154	NA	NA	0.00318549	3
7910630	C1orf31	BC116455	0.00319937	7
7894030	NA	NA	0.00320341	3
7943795	C11orf52	NM_080659	0.00320882	5
8020717	C18orf16	AK055069	0.00321129	3
8113097	C5orf36	NM_001145678	0.00321338	5
8041781	EPAS1	NM_001430	0.00322214	8
7903959	C1orf88	NM_181643	0.00322238	5
8090030	HSPBAP1	NM_024610	0.00323083	2
8023596	NA	ENST00000426779	0.00323195	4
8103437	PPID	NM_005038	0.00323793	5
8115375	FAM114A2	NM_018691	0.00323842	7
7898276	NA	ENST00000321418	0.00325058	6
7893919	NA	NA	0.00325378	1
7956401	SHMT2	NM_005412	0.00325649	2
8142993	NA	ENST00000431248	0.00326154	6
8132710	C7orf69	NM_025031	0.00326154	4
7896033	NA	NA	0.00326963	3
8041031	BRE	NM_199193	0.00329373	7
8004057	KIF1C	NM_006612	0.00329585	8
7896316	NA	NA	0.00330975	4
8151999	RGS22	NM_015668	0.00331598	5
7960338	NA	ENST00000382678	0.00331609	6
8169439	NA	ENST00000410841	0.00331672	3
7951435	NA	NA	0.00331699	1
7973377	BCL2L2	NM_004050	0.00332239	2
8074980	GSTT1	NM_000853	0.00332661	5
7967896	NA	ENST00000421695	0.00332782	3
8174592	NA	ENST00000459560	0.00332837	4
7958379	PWP1	NM_007062	0.00332912	7
8067382	PSMA7	NM_002792	0.00333	2
8025741	DNM2	NM_001005360	0.00333582	8
8134403	NA	ENST00000384318	0.00333625	4
7936089	NA	ENST00000391111	0.00334095	4
7906952	NA	ENST00000362979	0.003341	4
7966638	RBM19	NM_016196	0.00334151	4
