# Supplementary material for: Characterizing the Molecular Spatial and Temporal Field of Injury in Early-Stage Smoker Non–Small Cell Lung Cancer Patients after Definitive Surgery by Expression Profiling
Source: Oxford University Press journal article supplement (doi:10.1158/1940-6207.capr-12-0290), 2012-10-19
Supplement: 19406207capr120290-sup-tab4.xlsx [file 19406207capr120290-sup-tab4.xlsx]

## Sheet: Sheet 1
Supplementary Table 4
UNIQID	Symbol	Accession	p-value	Gene cluster
8000706	CDIPT	NM_006319	9.43134e-07	1
8019183	ACTG1	NM_001614	5.63393e-06	1
7928444	VCL	NM_014000	8.92434e-06	1
8013536	NOS2	NM_000625	1.06459e-05	1
7894824	NA	NA	1.07986e-05	1
7895690	NA	NA	1.12037e-05	1
7965423	BTG1	NM_001731	1.38885e-05	1
7959078	NA	GENSCAN00000059320	2.17667e-05	1
8025395	RPS28	NM_001031	2.6828e-05	1
7942824	RPS28	NM_001031	2.76185e-05	1
7923917	FAIM3	NM_005449	1.62371e-09	1
7987405	RASGRP1	NM_005739	9.58349e-09	1
8073194	GRAP2	NM_004810	3.14957e-08	1
7905028	LSP1	CR541728	1.64534e-07	1
8162236	SEMA4D	NM_006378	1.72625e-07	1
8130408	IPCEF1	NM_001130700	1.77214e-07	1
7929616	FRAT1	NM_005479	2.90981e-07	1
7932530	PIP4K2A	NM_005028	6.47592e-07	1
7944185	CD3G	NM_000073	1.04209e-06	1
7994769	CORO1A	NM_007074	1.24779e-06	1
7952056	CD3D	NM_000732	1.3619e-06	1
7994131	PRKCB	NM_002738	1.45075e-06	1
8081537	TRAT1	NM_016388	1.96743e-06	1
7963760	NFE2	NM_001136023	2.11231e-06	1
8105340	GZMA	NM_006144	2.14411e-06	1
8099471	FGFBP2	NM_031950	2.27262e-06	1
7934161	PRF1	NM_005041	3.31394e-06	1
8043236	GNLY	NM_012483	4.01554e-06	1
8128956	FYN	NM_002037	4.16173e-06	1
8109528	CYFIP2	NM_001037332	4.30032e-06	1
8023757	CD226	NM_006566	4.81917e-06	1
8015590	STAT5B	NM_012448	4.9278e-06	1
7906386	PYHIN1	NM_152501	5.81139e-06	1
7964436	ARHGAP9	NM_032496	5.85929e-06	1
8034851	EMR3	NM_032571	5.95059e-06	1
8049246	INPP5D	NM_001017915	6.3229e-06	1
8169792	SH2D1A	NM_002351	7.2372e-06	1
8081564	CD96	NM_198196	7.3488e-06	1
8151756	TMEM55A	NM_018710	7.64907e-06	1
7953835	KLRG1	NM_005810	7.75082e-06	1
8168524	P2RY10	NM_014499	7.82467e-06	1
8014891	IKZF3	NM_012481	8.17253e-06	1
8033987	ICAM3	NM_002162	8.87493e-06	1
7905571	S100A9	NM_002965	8.89766e-06	1
8047677	CD28	NM_006139	9.05374e-06	1
7973221	TRAJ17	AK301287	9.05756e-06	1
7909455	TRAF3IP3	NM_025228	9.21513e-06	1
8089519	BTLA	NM_181780	1.05578e-05	1
7963289	BIN2	NM_016293	1.11564e-05	1
8079392	CCR2	NM_001123396	1.15161e-05	1
8038809	NKG7	NM_005601	1.19434e-05	1
8105481	GAPT	NM_152687	1.21762e-05	1
8066848	PREX1	NM_020820	1.271e-05	1
7946275	GVIN1	NR_003945	1.33262e-05	1
7945132	FLI1	NM_002017	1.38123e-05	1
7965606	HAL	NM_002108	1.41476e-05	1
7896691	NA	NA	1.66237e-05	1
8075886	IL2RB	NM_000878	1.66237e-05	1
8014316	CCL5	NM_002985	1.66625e-05	1
8129410	THEMIS	NM_001010923	1.66733e-05	1
8046695	ITGA4	NM_000885	1.78624e-05	1
8020806	RNF125	NM_017831	1.95248e-05	1
7899253	ZDHHC18	NM_032283	2.25482e-05	1
8143781	GIMAP6	NM_024711	2.28781e-05	1
7920238	S100A12	NM_005621	2.56157e-05	1
7899753	LCK	NM_005356	2.56669e-05	1
7944179	CD3E	NM_000733	2.74424e-05	1
8046408	PDK1	NM_002610	7.8679e-07	1
8163775	MEGF9	NM_001080497	8.49912e-07	1
7924603	LBR	NM_002296	1.45522e-06	1
8060379	PSMF1	NM_178578	2.13795e-06	1
8083429	MBNL1	NM_021038	2.31862e-06	1
8068410	MEMO1	NM_015955	3.31572e-06	1
7943853	SDHD	NM_003002	3.32741e-06	1
8105436	MAP3K1	NM_005921	3.67331e-06	1
8014037	CRLF3	NM_015986	5.9197e-06	1
7979085	PYGL	NM_002863	6.77673e-06	1
7999553	CPPED1	NM_018340	1.1004e-05	1
8020508	RIOK3	NM_003831	1.42885e-05	1
7909283	NA	NA	1.49051e-05	1
7897522	RBP7	NM_052960	1.63479e-05	1
7902883	LRRC8D	NM_001134479	1.79543e-05	1
7904726	TXNIP	NM_006472	2.10592e-05	1
8100971	PPBP	NM_002704	1.06227e-08	1
7908376	RGS18	NM_130782	4.6935e-08	1
8148147	NA	ENST00000459148	5.56531e-08	1
8057797	SDPR	NM_004657	1.18519e-07	1
7961102	CLEC1B	NM_016509	1.49291e-07	1
8100966	PF4	NM_002619	5.13365e-07	1
8095422	STATH	NM_003154	7.05199e-07	1
8016044	ITGA2B	NM_000419	7.3808e-07	1
8169365	TMEM164	NM_032227	8.68642e-07	1
8063716	TUBB1	NM_030773	8.91127e-07	1
7966749	TESC	NM_017899	1.62921e-06	1
7944876	NRGN	NM_006176	2.71593e-06	1
7963851	KIAA0748	NM_001098815	3.30763e-06	1
8123744	F13A1	NM_000129	3.60119e-06	1
8157650	PTGS1	NM_000962	3.67823e-06	1
8054758	DDX11L2	NR_024005	1.10563e-05	1
7898655	CDA	NM_001785	1.1803e-05	1
8169263	VSIG1	NM_182607	1.20352e-05	1
7988033	EPB42	NM_000119	2.50972e-05	1
8007931	ITGB3	NM_000212	2.87448e-05	1
8101828	TSPAN5	NM_005723	2.38084e-07	1
8145454	BNIP3L	NM_004331	1.32721e-06	1
8072610	FBXO7	NM_012179	2.5388e-06	1
8175177	MBNL3	NM_018388	4.6611e-06	1
8160756	DCAF12	NM_015397	5.80752e-06	1
8016018	SLC25A39	NM_001143780	9.5282e-06	1
7901336	STRADB	NM_018571	1.035e-05	1
8162719	HEMGN	NM_018437	1.15268e-05	1
8143387	MKRN1	NM_013446	1.3068e-05	1
8047443	STRADB	NM_018571	1.86129e-05	1
7961580	LMO3	NM_018640	4.35388e-09	2
8094789	LIMCH1	NM_014988	2.84923e-07	2
7927694	PHYHIPL	NM_032439	2.1887e-06	2
8110721	ZDHHC11	NM_024786	1.21493e-05	2
8144621	C8orf12	NR_026814	1.32061e-05	2
7910923	FMN2	NM_020066	2.00059e-05	2
7903227	PALMD	NM_017734	2.33355e-05	2
7892673	NA	NA	2.46899e-05	2
8089835	FSTL1	NM_007085	2.87769e-05	2
8155802	GDA	NM_004293	6.37352e-07	2
7920196	SPRR2D	NM_006945	2.28739e-06	2
7946436	ASCL3	NM_020646	2.37781e-06	2
8103544	SPOCK3	NM_001040159	3.57381e-06	2
7920214	SPRR2E	NM_001024209	1.49466e-05	2
8021623	SERPINB7	NM_003784	1.58617e-05	2
7980861	CATSPERB	NM_024764	1.9927e-05	2
8178295	UBD	NM_006398	2.8971e-05	2
8086752	SNORD13	NR_003041	4.30658e-06	2
7981953	SNORD116-3	NR_003318	6.35527e-06	2
7981966	SNORD116-3	NR_003318	6.35527e-06	2
8145793	SNORD13	NR_003041	6.46646e-06	2
7981964	SNORD116-8	NR_003323	1.49169e-05	2
8084213	NA	ENST00000364359	2.5156e-05	2
